# Supplementary material for: Myocardial Rev-erb–Mediated Diurnal Metabolic Rhythm and Obesity Paradox
Source: PubMed Central journal article supplement — Circulation. 2022 Jan 17;145(6):448–64. doi: 10.1161/CIRCULATIONAHA.121.056076 (PMC8812427; doi:10.1161/circulationaha.121.056076), 2022-01-17
Supplement: cir-145-448-s001.pdf [file cir-145-448-s001.pdf]

# SUPPLEMENTAL MATERIAL

## Myocardial Rev-erb-mediated diurnal metabolic rhythm and obesity paradox

Shiyang Song, MD<sup>1,2#</sup>, Chih-Liang Tien, PhD<sup>3#</sup>, Hao Cui, MD, PhD<sup>4#</sup>, Paul Basil, PhD<sup>1,5</sup>, Ningxia Zhu, PhD<sup>1</sup>, Yingyun Gong, PhD<sup>1</sup>, Wenbo Li, PhD<sup>1</sup>, Hui Li, MS<sup>3</sup>, Qiying Fan, PhD<sup>6</sup>, Jong Min Choi, PhD<sup>7</sup>, Weijia Luo, PhD<sup>8</sup>, Yanfeng Xue, PhD<sup>1</sup>, Rui Cao, PhD<sup>1</sup>, Wenjun Zhou, PhD<sup>1</sup>, Andrea R. Ortiz, BS<sup>7</sup>, Brittany Stork, BS<sup>7</sup>, Vatsala Mundra, BS<sup>1</sup>, Nagireddy Putluri, PhD<sup>7</sup>, Brian York, PhD<sup>7</sup>, Maoping Chu, MD, PhD<sup>2</sup>, Jiang Chang, MD, PhD<sup>8</sup>, Sung Yun Jung, PhD<sup>7</sup>, Liang Xie, PhD<sup>6</sup>, Jiangping Song, MD, PhD<sup>4\*</sup>, Lilei Zhang, MD, PhD<sup>3\*</sup>, Zheng Sun, PhD<sup>1,6\*</sup>

<sup>1</sup> Department of Medicine, Division of Diabetes, Endocrinology and Metabolism, Baylor College of Medicine, Houston, Texas, USA

<sup>2</sup> Children's Heart Center, Institute of Cardiovascular Development and Translational Medicine, The Second Affiliated Hospital and Yuying Children's Hospital of Wenzhou Medical University, Wenzhou, China

<sup>3</sup> Department of Molecular and Human Genetics, Baylor College of Medicine, Houston, Texas, USA

<sup>4</sup> State Key Laboratory of Cardiovascular Disease, Fuwai Hospital; National Center for Cardiovascular Diseases, Chinese Academy of Medical Sciences (CAMS) and Peking Union Medical College (PUMC), Beijing, China

<sup>5</sup> Department of Critical Care, Division of Anesthesiology, Critical Care and Pain Medicine, University of Texas MD Anderson Cancer Center, 1515 Holcombe Blvd, Unit 110, Houston, TX, 77030-4009, USA

<sup>6</sup> Department of Medicine, Division of Atherosclerosis and Vascular Medicine, Cardiovascular Research Institute (CVRI), Houston, Texas, USA

<sup>7</sup> Department of Molecular and Cellular Biology, Baylor College of Medicine, Houston, Texas, USA

<sup>8</sup> Center for Genomic and Precision Medicine, Texas A&M University, Institute of Biosciences and Technology, Houston, Texas, USA

# Equal contributions

\* Correspondence:

[fwsongjiangping@126.com](mailto:fwsongjiangping@126.com), [lilei.zhang@bcm.edu](mailto:lilei.zhang@bcm.edu), [zheng.sun@bcm.edu](mailto:zheng.sun@bcm.edu)

## Index

### Expanded Methods

**Supplemental Figure S1.** Cardiomyocyte-specific ablation of Rev-erb does not affect behavioral rhythm.

**Supplemental Figure S2.** Cardiomyocyte-specific ablation of Rev-erb causes progressive heart failure.

**Supplemental Figure S3.** Inducible ablation of Rev-erb in adult mice causes progressive heart failure.

**Supplemental Figure S4.** Transcriptomic analyses of Rev-erb function in the heart.

**Supplemental Figure S5.** E4bp4 contributes to Rev-erb-mediated cardiac transcription regulation.

**Supplemental Figure S6.** Potential role of Bmal1 in Rev-erb-mediated cardiac transcription regulation.

**Supplemental Figure S7.** Integrated transcriptomics, proteomics, and lipidomics analysis.

**Supplemental Figure S8.** Cardiac Rev-erb regulates the diurnal rhythm of myocardial metabolism.

**Supplemental Figure S9.** HFNSD does not modulate cardiac dysfunctions in Rev-CKO mice.

**Supplemental Figure S10.** HFHSD modulates cardiac dysfunctions in Rev-CKO mice.

**Supplemental Figure S11.** High-sugar diets do not ameliorate Rev-CKO cardiac dysfunctions.

**Supplemental Figure S12.** Molecular chronotypes of the cardiac molecular clock in human hearts.

**Supplemental Table S1.** Key resources table.

**Supplemental Table S2.** Diet composition.

**Supplemental Table S3.** Inclusion and exclusion criteria for patient samples.

**Supplemental Table S4.** General characteristics of the patients.

**Supplemental Table S5.** Cardiac functions in male patients only.

**Supplemental Table S6.** Statistical details.

## Expanded Methods

### **Mice**

Rev-erba<sup>loxP</sup> (Nr1d1<sup>tm1.2Rev</sup>, MGI ID 5426700), Rev-erbβ<sup>loxP</sup> (Nr1d2<sup>tm1.1Rev</sup>, MGI ID 5426699), αMHC-Cre (RRID:IMSR\_JAX:011038), and αMHC-MerCreMer (RRID:IMSR\_JAX:005657) mouse lines were previously described<sup>19–22</sup>. All mice were on the C57BL/6 genetic background. Male and female mice at the age of 2–8 months were used for experiments unless indicated otherwise in figure legends or the main text. We used both male and female mice for the initial echocardiography analysis and did not observe obvious sex differences. We then used male mice for omics studies for easy comparisons among different conditions and datasets, considering the high cost of these experiments. We then validated the transcriptomic results in female mice using RT-qPCR analyses. We performed HFHSD dietary rescue experiments in both male and female mice and found similar results. All mice were group-housed (3–4 mice per cage) in a 12 h light/ 12 h dark (7 am - 7 pm) facility with free access to a chow diet. For MCM mice, tamoxifen at 75mg/kg was i.p. injected daily for 5 consecutive days. Mice locomotor activity and energy expenditure were measured with the Comprehensive Lab Animal Monitoring System for Home Cages (CLAMS-HC) and the Oxymax software (Columbus Instruments). Mice were acclimated to the monitoring environments for at least 48 hours before the experiment. The mice were continuously monitored for 130 hours under the normal light-dark cycles while mice were freely allowed to access food and water. Oxygen consumption was normalized to lean tissue mass. Etomoxir was dissolved in DMSO at 10 ug/ul for stock and was diluted with saline immediately before i.p. injection at 20 mg/kg bodyweight. 2-Deoxy-D-glucose (2-DG) was diluted in saline at 50 ug/ul for stock and was i.p. injected at 500 mg/kg bodyweight. To increase dietary sugars, we supplemented drinking water with 20% glucose, 20% sucrose, or 20% fructose, respectively. Water was made fresh and replaced every 2 days. All the animal procedures followed the guidelines of the Institutional Animal Care and Use Committee (IACUC) at Baylor College of Medicine.

### **Echocardiography**

The Vevo 2100 VisualSonics ultrasound system (Visual Sonics Inc.) was used with an attached Integrated Rail System III for imaging acquisition. Mice were anesthetized with 2% isoflurane mixed with 100% oxygen through an inhalation tube. The core body temperature of the mouse was monitored by a rectal temperature probe and maintained at around 37°C by a tensor lamp throughout the procedure, and the heart rate was maintained at 400–500 bpm. Two-dimensional images were obtained at 2.5–3 frames/s using a 15 MHz probe (RMV 707B, Visual Sonics) in the parasternal short-axis views to guide M-mode analysis at the midventricular level. Image measurement and analysis were performed by researchers who were blinded to the mouse genotype.

### **Histology**

Hearts were fixed in 4% paraformaldehyde in PBS overnight at 4 °C and incubated in 30% sucrose in PBS at 4 °C overnight, followed by embedding in paraffin and section at 6 μm thickness. Trichrome staining was performed at the neuropathology core following the standard protocol. For immunofluorescence staining, heart sections were permeabilized with permeabilization solution (0.1% TritonX-100, 0.1% sodium citrate) followed by antigen retrieval, blocking, and incubation with primary antibodies (anti-WGA, Fisher scientific, cat # W11261; anti-Cardiac troponin T: ABclonal, cat # A4914). For WGA staining, quantification analysis of relative cross-section area was processed by ImageJ software. For cardiac troponin T staining, slides were incubated in the fluorescence-conjugated secondary antibody (Invitrogen, cat # A-11035), and then TUNEL assay (Roche, cat # 11684795910) was performed following the manufacturer's instructions.

### **Western blot and RT-qPCR**

Hearts were lysed in a modified RIPA buffer containing 2% SDS and supplemented with phosphatase and protease inhibitors. Lysates were resolved by Tris-glycine SDS-PAGE, transferred to PVDF membrane, and blotted with antibodies against Rev-erba (Cell Signaling Technology, cat # 13418), GAPDH (Cell Signaling Technology, cat # 2118L), Bmal1 (Cell Signaling Technology, cat # 14020S), Ran (ABclonal, cat # A0976), OXPHOS proteins (MitoSciences, cat # MS604), Gpam (ABclonal, cat # A6610), Ppara (ABclonal, cat # A6697), Ucp3 (ABclonal, cat # A16996), Acss1 (ABclonal, cat # A15007), Acadm (ABclonal, cat # A4567), CD36 (ABclonal, cat # A19016), Acadl (ABclonal, cat # A1266), Ech1 (ABclonal, cat # A12944), Hadhb (ABclonal, cat # A5716), Hsp90 (Cell Signaling Technology, cat # 4874). Images were acquired using LumiQuant AC600 (Acuronbio Technology Inc), quantification analysis was processed by ImageJ software. Total RNA was extracted using TRIzol (Sigma) and RNeasy Mini Kit (Qiagen). Reverse transcription and quantitative PCR were performed with the High-Capacity RT kit, SYBR Green PCR Master Mix, and the Quant Studio 6 instrument (Life

Science) using the relative quantification method with standard curves. 18S RNA was used as the housekeeping denominator.

### ***Isolation and culture of adult mouse cardiomyocytes***

Adult mouse cardiomyocytes were obtained from freshly harvested adult hearts at 2 months of age at night using the Langendorff method<sup>23</sup>. Mice were treated with heparin (5 IU/g body weight) via intraperitoneal injection 30 minutes before anesthetization with 3% isoflurane through an inhalation tube. The heart was rapidly excised, and the aorta was cannulated onto a Langendorff apparatus and perfused with 8 ml perfusion buffer, followed by 50 ml of recirculating Liberase Blendzyme type 1 (Roche) digestion buffer. The heart tissue was removed, shredded, and filtered through 100 $\mu$ m sterile cell strainers. The supernatant was collected, and then CaCl<sub>2</sub> was added in a graded fashion to sequentially increase the Ca<sup>2+</sup> concentration to 500  $\mu$ M<sup>24</sup>. The suspension was then seeded on laminin-coated culture dishes overnight at 37°C in a 5% CO<sub>2</sub> incubator. The media was replaced on the second day to wash away unattached cells. siRNAs (Horizon, Cat # M-051721-01, Cat # M-059128-01, and Cat # M-063246-01) were used to knock down Rev-erb $\alpha$ , Rev-erb $\beta$ , and E4bp4, respectively, in adult cardiomyocytes. DharmaFECT 1 Transfection Reagent (Horizon, Cat # T-2001-02) was used for siRNA transfection following the manufacture's instruction.

### ***Cell culture, siRNA transfection, and recombinant DNA***

The AC16 human cardiomyocyte cell line was cultured in DMEM/F12 (Sigma Cat # D6434) containing 12.5% fetal bovine serum (FBS) and 1% antibiotics (streptomycin and penicillin). Cells were incubated at 37°C at 5% CO<sub>2</sub>. Experiments were performed when the cell population reached around 70% confluence. All experiments were repeated at least three times. siRNAs (Horizon, Cat # M-003411-02-0005, Cat # M-003432-00-0005, and Cat # L-012704-00-0005) were used to knock down Rev-erb $\alpha$ , Rev-erb $\beta$ , and E4bp4, respectively, in AC16 cells. DharmaFECT 1 Transfection Reagent (Horizon, Cat # T-2001-02) was used for siRNA transfection following the manufacture's instruction. For overexpressing E4bp4, the pcDNA3.1-E4bp4 plasmid (Addgene 34572)<sup>25</sup> was cotransfected with a GFP plasmid using the jetPRIME transfection reagent (Polyplus, Cat # 114-07), with the GFP plasmid alone serving as the negative control. GFP-positive cells were sorted and collected at 50h after transfection, followed by RT-qPCR and isotope tracer studies.

### ***Radioactive isotope tracing***

For fatty acids oxidation, adult mouse cardiomyocytes or AC16 cells were incubated in the culture medium supplemented with BSA-conjugated [9,10-<sup>3</sup>H(N)]-palmitate and carnitine for 2 h at 37 °C in the incubator. The resultant <sup>3</sup>H<sub>2</sub>O in the incubation solution was separated from precursors using ion-exchange columns (DOWEX 1X4-400) and was measured by a scintillation counter<sup>26</sup>. For glucose oxidation, adult mouse cardiomyocytes were incubated in the culture medium supplemented with D-[<sup>14</sup>C(U)]-Glucose for 2.5 h at 37 °C in the incubator. The resultant <sup>14</sup>CO<sub>2</sub> was collected using the filter paper containing 400 ul 5N NaOH and then measured by a scintillation counter<sup>27</sup>. For cardiomyocytes glucose uptake, 2-[<sup>3</sup>H(N)]-deoxy-D-glucose was used in the presence or absence of 20  $\mu$ M cytochalasin B, an inhibitor of glucose transport. The cardiomyocytes were washed three times with PBS before lysis. Intracellular glucose was determined by subtracting the <sup>3</sup>H counting values in the presence of cytochalasin B from that without cytochalasin B<sup>26</sup>. Cells from one mouse were treated as one biological replicate.

### ***Mitochondrial DNA, respiratory enzyme activity, and cellular respirometry***

For mitochondrial DNA copy number analysis, heart samples were lysed in lysis buffer (67mM Tris, 16.6mM Ammonium Sulfate, 6.5 mM MgCl<sub>2</sub>, 1% 2-Me, 0.5% Triton X-100, 1mg/ml Proteinase K) to extract total DNA. qPCR was performed to quantify mtND1 (GTGGCTCATCTACTCCACTGA, TCGAGCGATCCATAACAATAA), a mitochondrial gene, after normalized to a nuclear gene Ndufv1. SDH enzyme activity was measured by the succinate dehydrogenase activity colorimetric assay kit (Sigma, Cat # MAK197) following the manufacturers' instructions. The oxygen consumption rate was determined using a Seahorse Bioscience XF24 Extracellular Flux Analyzer with a mitochondrial stress test kit. AC16 cells were cultured on XF24 microplates in DMEM/F12 with 12.5% FBS. The culture medium was switched to starvation medium (0.1 g/L glucose, 1% FBS) at 24h before the assay. Cellular respiration was then assayed in the presence of BSA-conjugated palmitate, first at the baseline, then after serial addition of mitochondrial inhibitor oligomycin (1  $\mu$ mol/L), mitochondrial uncoupler carbonyl cyanide p-trifluoromethoxyphenylhydrazone (FCCP, 1  $\mu$ mol/L), and respiratory chain inhibitor antimycin A and rotenone (1  $\mu$ mol/L each). ATP turnover is calculated by subtracting oligomycin-dependent respiration

from baseline respiration. Respiratory capacity was calculated by subtracting antimycin A-dependent respiration from the FCCP-dependent respiration following the manufacturer's instruction.

### ***RNA-seq and data processing***

RNA-seq was performed using total RNA extracted from left ventricles in mice at 2 months of age ( $n = 3$  at each condition, total of 36 samples). RNA was isolated using Trizol reagent (Sigma) followed by RNeasy Mini Kit (Qiagen). The KO vs. WT samples were sequenced on the BGI MGISEQ-2000 platform with PE100 and 6 Gb total clean reads per sample. The sequencing data was filtered with SOAPnuke (v1.5.2) by removing reads containing sequencing adapter, reads whose low-quality base ratio (base quality less than or equal to 5) is more than 20%, and reads whose unknown base ('N' base) ratio is more than 5%. The resultant clean reads were obtained and stored in FASTQ format and mapped to the reference genome GRCm38.p6 using HISAT2 (v2.0.4). Bowtie2 (v2.2.5) was applied to align the clean reads to the reference coding gene set, and the expression level of genes was calculated with RSEM (v1.2.12). The differential expression analysis was performed using the DESeq2 (v1.4.5). GO and KEGG enrichment analysis of annotated different expressed genes was performed by DAVID Bioinformatics Resources 6.7. The z-score was calculated using the formula  $z = (x - \mu) / \sigma$ , where  $x$  is the FPKM value for each individual sample,  $\mu$  is the population mean for all WT and KO samples at all ZTs (36 samples total), and  $\sigma$  is the population standard deviation of all 36 samples. Analyzed RNA-seq results of Bmal1-CKO vs. WT hearts<sup>28</sup> was downloaded from GSE43073.

### ***ChIP-seq and data processing***

Mouse hearts were harvested at ZT9 and ZT21 (6 male WT mice at 2.5 months old at each time point). After nuclei isolation, PCM-1 antibodies (Sigma, cat #HPA023370) were used to purify cardiomyocyte nuclei. Two heart samples were combined in one tube for sonication on the Covaris S220 sonicator. Sonication conditions were as follows: peak power 140, Duty factor 8, cycles/burst 200, 18 min. ChIP was performed with the Rev-erba antibody (Cell signaling, cat # 13418). The precipitated DNA was then pooled and amplified according to the guideline of Illumina, followed by sequencing on illumine nextseq 500. Sequenced reads were aligned to the reference mouse genome (mm10) using Bowtie 2 (version 2.3.4.2). Non-redundant and uniquely mapped reads were extended to 100 bp in both 5' and 3' directions and used for downstream analysis. Read coverage for every 10 bp bins was calculated using the deepTools bamCoverage (version 3.3.0) function, avoiding blacklist regions of the mouse genome (ENCODE project). Genome browser tracks were visualized in Integrative Genome Browser (IGV version 1.5). Peak calling was performed on unique reads with MACS2 (2.1.2) using input as control. Peaks with  $q < 0.05$  and 4-fold over input were used for heat map and Venn diagram comparisons between ZT9 and ZT21. Common and differential peaks at ZT9 and ZT21 were defined by at least one basepair overlap between peaks using the intersect function of BEDTools v2.26.0. For heat map, deepTools computeMatrix and plotHeatmap (version 3.3.0) were used to summarize coverage scores over Rev-erba peaks. The color key indicates the minimum and maximum frequency of the ChIP signal. Stringent peaks with  $p < 1 \times 10^{-5}$  and  $\geq 1$  read per million mapped reads that were only detected at ZT9 (but not at ZT21) were used for motif analyses. Peaks within 10 kb of the transcription start sites (TSSs) of DEGs were used for further analysis. Motif analyses were performed using sequences within +/- 100 bp of the center of the peaks with HOMER function findMotifsGenome.pl, on default parameters. Bmal1 ChIP-seq data<sup>29</sup> were downloaded from GSE110602 and random non-DEGs were generated using random sampling function, R Project version 4.0.5.

### ***Proteomics***

For proteomics profiling, 3 male mice at each genotype (WT and Rev-CKO) were harvested at each time-point of the 3 ZTs (ZT6, 14, and 22) at 2.5 months old. Dissected mouse heart tissues were pulverized and added with 10 sample volumes of lysis buffer (50mM Ammonium Bicarbonate, 1mM CaCl<sub>2</sub>). Tissue suspensions were snap-frozen using liquid nitrogen, thawed at 37°C, and boiled at 95°C for 3 min to lyse tissue. All freeze-thaw-denaturation procedures were repeated three times. Lysates were double digested with 1/20 and 1/100 of trypsin (GenDepot, T9600) overnight and 4h at 37°C, respectively. Double-digested peptides were fractionated with micro pipet tip C18 column into 15 fractions and pooled into 5 fractions as described previously<sup>30</sup>. Fractionated peptides were subjected to nanoLC-MS/MS analysis with nanoLC-1200 (Thermo Scientific) coupled to Orbitrap Fusion Lumos mass spectrometer (Thermo Scientific) with NSI source. The peptides were loaded onto an in-house Reprosil-Pur Basic C18 (1.9  $\mu$ m, Dr. Maisch GmbH, Germany) trap column (2 cm length, 100  $\mu$ m i.d.) and separated by 5 cm column (150 $\mu$ m i.d.) with a 75 min discontinuous gradient of 4-24 % of acetonitrile/0.1% formic acid at a flow rate of 800 nl/min. Separated peptides were directly electro-sprayed into the mass spectrometer. Precursor MS spectrum was scanned at 300-1400 m/z 120k resolution at 400 m/z,  $5 \times 10^5$  AGC

target (50 ms maximum injection time) by Orbitrap. Then, the top 50 strongest ions were scanned by Quadrupole with 2 m/z isolation window, 15 s exclusion time ( $\pm 7$  ppm), fragmented by HCD with 32 normalized collision energy, and detected by Ion trap with rapid scan range,  $5 \times 10^3$  AGC target, and 35 ms of maximum injection time. Obtained MS/MS spectra were searched against the target-decoy Mouse RefSeq database (release 2020) in Proteome Discoverer 2.1 interface (PD 2.1, Thermo Fisher) with the Mascot algorithm (Mascot 2.4, Matrix Science). Dynamic modifications of the acetylation of the N-terminus and oxidation of methionine were allowed. The precursor mass tolerance was confined within 20 ppm with fragment mass tolerance of 0.5 daltons and a maximum of two missed cleavages was allowed. Assigned peptides were filtered with 1% false discovery rate (FDR) using percolator validation based on q-value. Label-free proteomics data were assigned to gene ID and calculated with the iBAQ algorithm for abundance by GPProuper<sup>31</sup>. Differentially expressed proteins between two groups were determined by t-test. GO analyses were performed using DAVID or iPathwayGuide as mentioned in the figure legends. The z-score was calculated using the formula  $z = (x - \mu) / \sigma$ , where x is the quantification value for each individual sample,  $\mu$  is the population mean for all samples, and  $\sigma$  is the population standard deviation of all samples.

### **Lipidomics**

Heart ventricle tissues were harvested from male mice at 3 months old (n = 3 at each condition) and were snap-frozen in liquid nitrogen. Lipids were extracted as previously described<sup>32-34</sup>. Lipids were separated on a Shimadzu CTO-20A Nexera X2 UHPLC systems, 1.8  $\mu$ m particle 50  $\times$  2.1 mm Acquity HSS UPLC T3 column (Waters, Milford, MA). Lipidomics acquisition performed in both pos and neg mode ionization. Pos mode lipids were normalized by Internal Standard PC 17:0; [M+H]<sup>+</sup>, Neg mode lipids were normalized by Internal Standard PC 34:0.

### **Metabolomics**

Heart ventricle tissues were harvested from male mice at 2.5 months of age (n = 3 at each condition) and snap-frozen in liquid nitrogen. Metabolites were extracted as previously described methods<sup>35,36</sup>. Data were acquired in multiple reaction monitoring (MRM) using Agilent QQQ LC-MS systems. Separation of TCA and glycolysis metabolites were performed using 5 mM ammonium acetate in water as buffer pH 9.9 (A), and 100% acetonitrile as buffer (B) using Luna 3  $\mu$ M NH<sub>2</sub> column (Phenomenex, Torrance, CA) and measured 6495 triple quadrupole mass spectrometer via ESI negative mode (Agilent Technologies, Santa Clara, CA). The Gradient used is as follows: 0-20 min-80% B (Flow rate 0.2ml/min); 20-20.10 min- 80% to 2 % B; 20.10-25 min-2% B (Flow rate 0.3ml/min); 25-30 min 80% B (Flowrate 0.35ml/min); 30-35 min-80%B (Flow rate 0.4ml/min); 35-38 min 80% B (Flow rate 0.4ml/min); followed by re-equilibration at the end of the gradient to the initial starting condition 80% B at Flow rate of 0.2 ml/min. Separation and measurement of amino acids were performed using Zorbax eclipse XDB C-18, 1.8 micron, 4.6 x 100 mm column on 6495 triple quadrupole mass spectrometer via ESI Positive mode (Agilent Technologies, Santa Clara, CA). Mobile phases A and B were 0.1% formic acid in water and acetonitrile, respectively. The gradient used is as follows: 0 min-2% B; 6 min- 2% of B, 6.5 min-30 % B, 7 min-90% of B, 12 min 95% of B, 13 min 2% of B followed by re-equilibration at the end of the gradient 20 min to the initial starting condition 2% of B. Flow rate: 0.2 ml/min. Separation and measurement of CoA's and carnitines were performed using Zorbax eclipse XDB C-18, 1.8 micron, 4.6 x 100 mm column on 6495 triple quadrupole mass spectrometer via ESI Positive mode (Agilent Technologies, Santa Clara, CA). Mobile phases A and B were 0.1% formic acid in water and acetonitrile, respectively. Gradient used is as follows: 0 min-2% B; 6 min- 2% of B, 6.5 min-30 % B, 7 min- 90% of B, 12 min 95% of B, 13 min 2% of B followed by re-equilibration at end of the gradient 20 min to the initial starting condition 2% of B. Flow rate: 0.2 ml/min. Separation and measurement of nucleotides were performed using Zorbax eclipse XDB C-18, 1.8 micron, 4.6 x 100 mm column on 6495 triple quadrupole mass spectrometer via ESI Positive mode (Agilent Technologies, Santa Clara, CA). Mobile phases A and B were 0.1% formic acid in water and acetonitrile, respectively. The gradient used is as follows: 0-6 min 2% B, 6-6.50 min 30% B, 7-12 min 95% B, 12-13 min 2% B, and re-equilibration till the end of the gradient 20 min. Flow rate: 0.2 ml/min). The data were normalized with internal standards, and log<sub>2</sub> transformed on a per-sample, per-method basis. Statistical analyses were performed with either ANOVA or t-test in R Studio (R Studio Inc., Boston, MA). Differential metabolites were identified by adjusting the p-values for multiple testing at an FDR (Benjamini Hochberg method) threshold of <0.25.

### **Glucose tolerance test and blood metabolites measurements**

For the intraperitoneal glucose tolerance test (ipGTT), mice were fasted for 6 hours (from ZT3-ZT9) and were given a 2 g/kg glucose challenge. D-(+)-Glucose (Sigma-Aldrich) was dissolved in autoclaved deionized water

at 37 °C water bath. The basal blood glucose level as well as the blood glucose levels at 15 min, 30 min, 60 min, 90 min, and 120 min after glucose injection were measured by glucometers (OneTouch Ultra 2, Lifescan). Serum insulin, FFAs, and ketone bodies were measured using Mouse Insulin ELISA Kit (Cat # 90080, Crystal Chem), Free Fatty Acid Fluorometric Assay Kit (Cat # 700310, Cayman Chemical), and  $\beta$ -Hydroxybutyrate LiquiColor (Cat # 2440-058, Stanbio Laboratory), respectively, following the manufacturers' instructions.

### **Human heart tissues and clinical data**

All human hearts were obtained from the Heart Transplant Center of Fuwai Hospital, Beijing, China. The study was approved by the Ethics Committee of Fuwai Hospital. Written informed consent was obtained from patients. The 36 human heart samples were failing hearts collected from patients who underwent heart transplants between 2013 and 2018. Patients were diagnosed with idiopathic DCM according to the ESC guideline<sup>37</sup>. Patients with known etiology, such as hereditary conditions or valvular diseases, were excluded (**Supplemental Table S3**). Patients were not on mechanical circulatory support (LVAD). For storing the hearts in the biobank, hearts were perfused *ex vivo* using histidine-tryptophan-ketoglutarate (HTK) cardioplegia buffer before being transferred on ice for dissection. The dissected tissue samples were immediately frozen in liquid nitrogen, followed by storage at -80 °C. Heart tissue samples collected in the early morning (6:00 am - 10:00 am) or late afternoon (14:00 pm - 18:00 pm) were selected. Six normal healthy hearts, once considered as donor hearts but not used for transplantation due to non-cardiac reasons, were used to set the average baseline during data analysis. The six healthy donor hearts were frozen in liquid nitrogen within 1h after clinical death (cessation of heartbeat and respiration), which was within 1d (24h) after the declaration of brain death. Organ procurement organizations coordinate the donor consent and the assessment of the potential donor organ<sup>38</sup>. The life-support system was withdrawn after the declaration of brain death or irreversible brain damage upon the consent of the donor's family, and the heart was then explanted after clinical death was confirmed. The surgeons involved in organ collection or transplantation did not participate in end-of-life care or the declaration of death. The collection time was defined as when tissues were frozen in liquid nitrogen. The severity of mitral regurgitation was graded using color doppler echocardiographic methods. For RT-qPCR analysis, total RNA was extracted from 60 mg/sample frozen left ventricles using Trizol. RNA yield and quality were assessed using the NanoDrop spectrophotometer (Thermo Scientific). One  $\mu$ g RNA was reverse transcribed into 10  $\mu$ l using the PrimeScript RT Master Mix (Takara). An aliquot of each cDNA sample from normal donor hearts was pooled to generate a standard stock. Serial dilutions of the standard stock were performed to generate standard curves for quantification for each plate with the SYBR Green master mix (Thermo Fisher) on the ViiA 7 Real-Time PCR System (Thermo Fisher). The Rev-erba/Bmal1 ratios were calculated for all heart samples. The average of the six healthy heart samples (3 in the morning, 3 in the afternoon) was used to normalize the samples from DCM patients. The resultant relative Rev-erba/Bmal1 ratio was converted to log the scale and was used to assign groups based on the sample collection time. All available preoperative clinical data were used for data analysis.

### **Statistics**

Littermates were used as control mice for all experiments without randomization. The sample size for each group was indicated in the figures, figure legends, or the methods section above. No statistical methods were used to pre-determine sample sizes. Instead, sample sizes were determined based on previous publications. Animals were excluded if they showed distress, infection, bleeding, or anorexia due to surgery or treatment or if they showed mis-injection at postmortem examination. Most comparisons between two groups were analyzed using a two-tailed unpaired *t*-test. Multiple groups were analyzed using two-way ANOVA with Bonferroni post hoc testing. All statistical analyses and S.E.M. calculations were based on individual mice. Normality was tested by the Shapiro-Wilk test. All tests were two-sided. Metabolomics, lipidomics, and RNA-seq were performed by experimenters who were blinded to the mouse genotype. For proteomics, the *t*-test was used for comparing two groups with  $p < 0.05$  as the significant cut-off. For metabolomics, the data were normalized with internal standards and log<sub>2</sub> transformed on a per-sample, per-method basis. Differential metabolites were identified by adjusting the *p*-values for multiple testing at an FDR (Benjamini Hochberg method) threshold of  $<0.25$ . For lipidomics, the missing values for lipids were imputed using the K nearest-neighbor method. The data were normalized and log<sub>2</sub> transformed, followed by the day median normalization. The compound-by-compound *t*-test was applied to identify the top differentially regulated lipids that passed the nominal threshold  $P < 0.05$ , followed by the Benjamini-Hochberg procedure for FDR correction. For human clinical data, binary logistic regressions using the sigmoid function or linear regressions using affine function were performed by SPSS version 20.0 (IBM, Armonk, NY, USA), and two-sided *t*-tests were used for comparing two molecular

chronotypes.  $P < 0.05$  was set as significant. See **Supplemental Table S6** for statistical details for each figure panel.

***Data availability***

RNA-seq (GSE152372) and ChIP-seq (GSE153150) data are available in GEO. Proteomics data are available in the MASSIVE repository (MSV MSV000088075) <ftp://MSV000088075@massive.ucsd.edu> Metabolomics and lipidomics data are available in National Metabolomics Data Repository, Project ID: PR001208, Project DOI: 10.21228/M8JX2X, Study ID: ST001915, ST001916, and ST001917. The data that support the findings of this study are available from the corresponding author upon reasonable request.



## Supplemental Figures

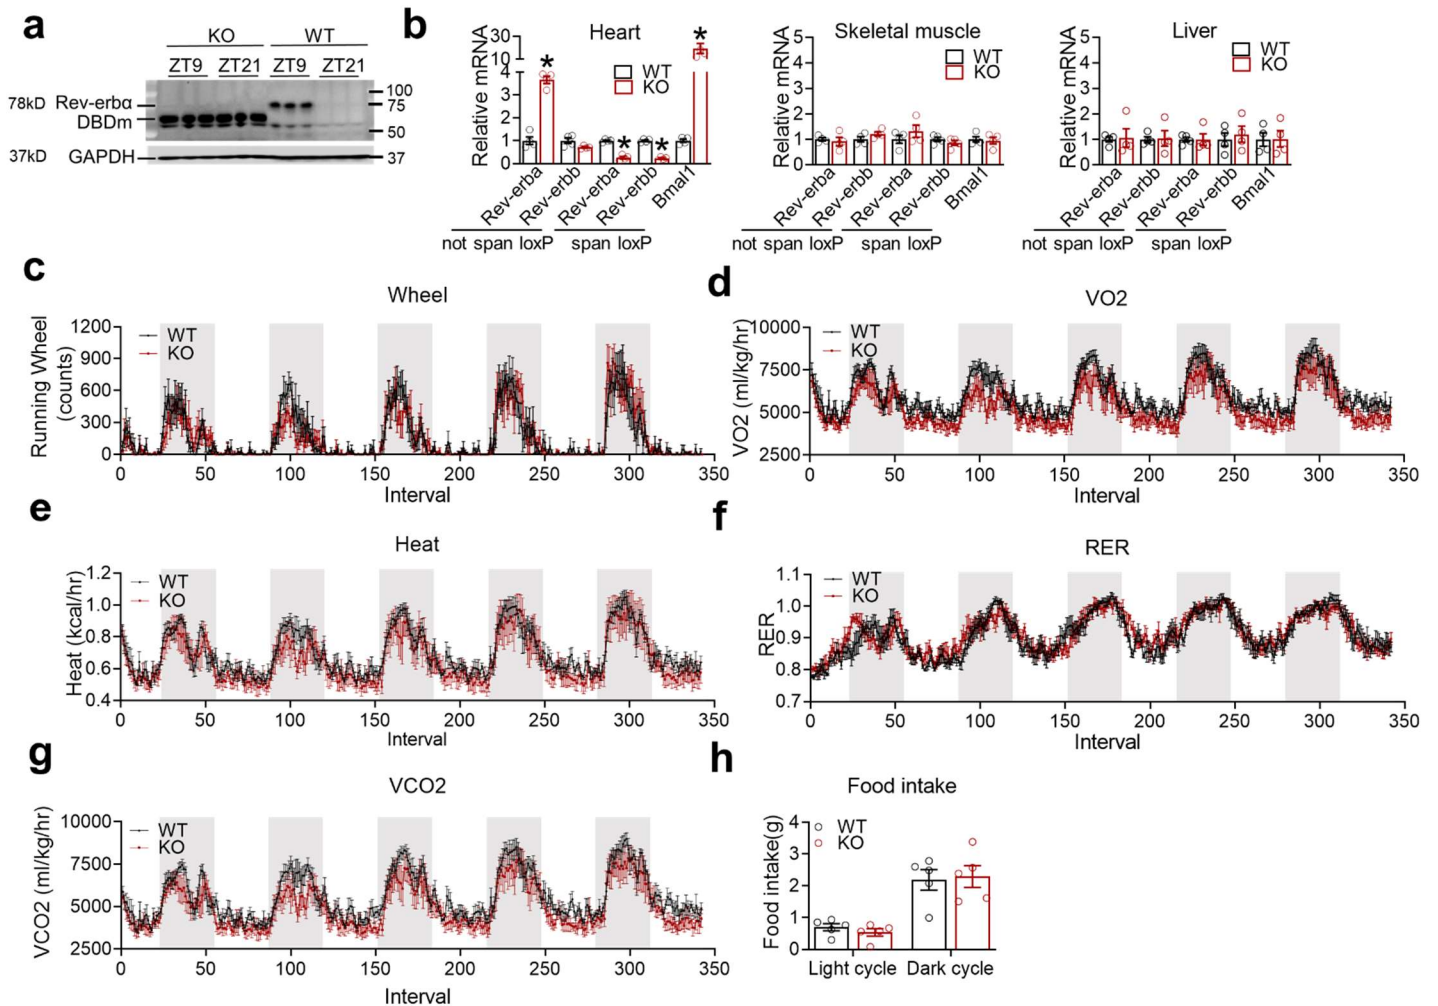

**Supplemental Figure S1. Cardiomyocyte-specific ablation of Rev-erb does not affect behavioral rhythm.** (a) Western blot analysis of Rev-erba in the WT and KO heart in male mice at 2.5 months, n = 3 mice. (b) RT-qPCR analysis of the heart, quadriceps muscle, and liver in WT and KO male mice at 2.5 months using primer pairs that either span or not span the floxed exons in Rev-erba and Rev-erbb, n = 4 mice. (c) Voluntary wheel-running activities under normal light-dark cycles, n = 5 mice. (d) Oxygen consumption measured by indirect calorimetry, n = 5 mice. (e) Energy expenditure, n = 5 mice. (f) Respiratory exchange ratio (RER), n = 5 mice. (g) Carbon dioxide production, n = 5 mice. (h) Food intake, n = 5 mice. The sample size is indicated in the figure or described in the legend. Each dot represents an individual mouse. Data are mean ± S.E.M. \* p < 0.05 between groups by two-sided *t*-test.



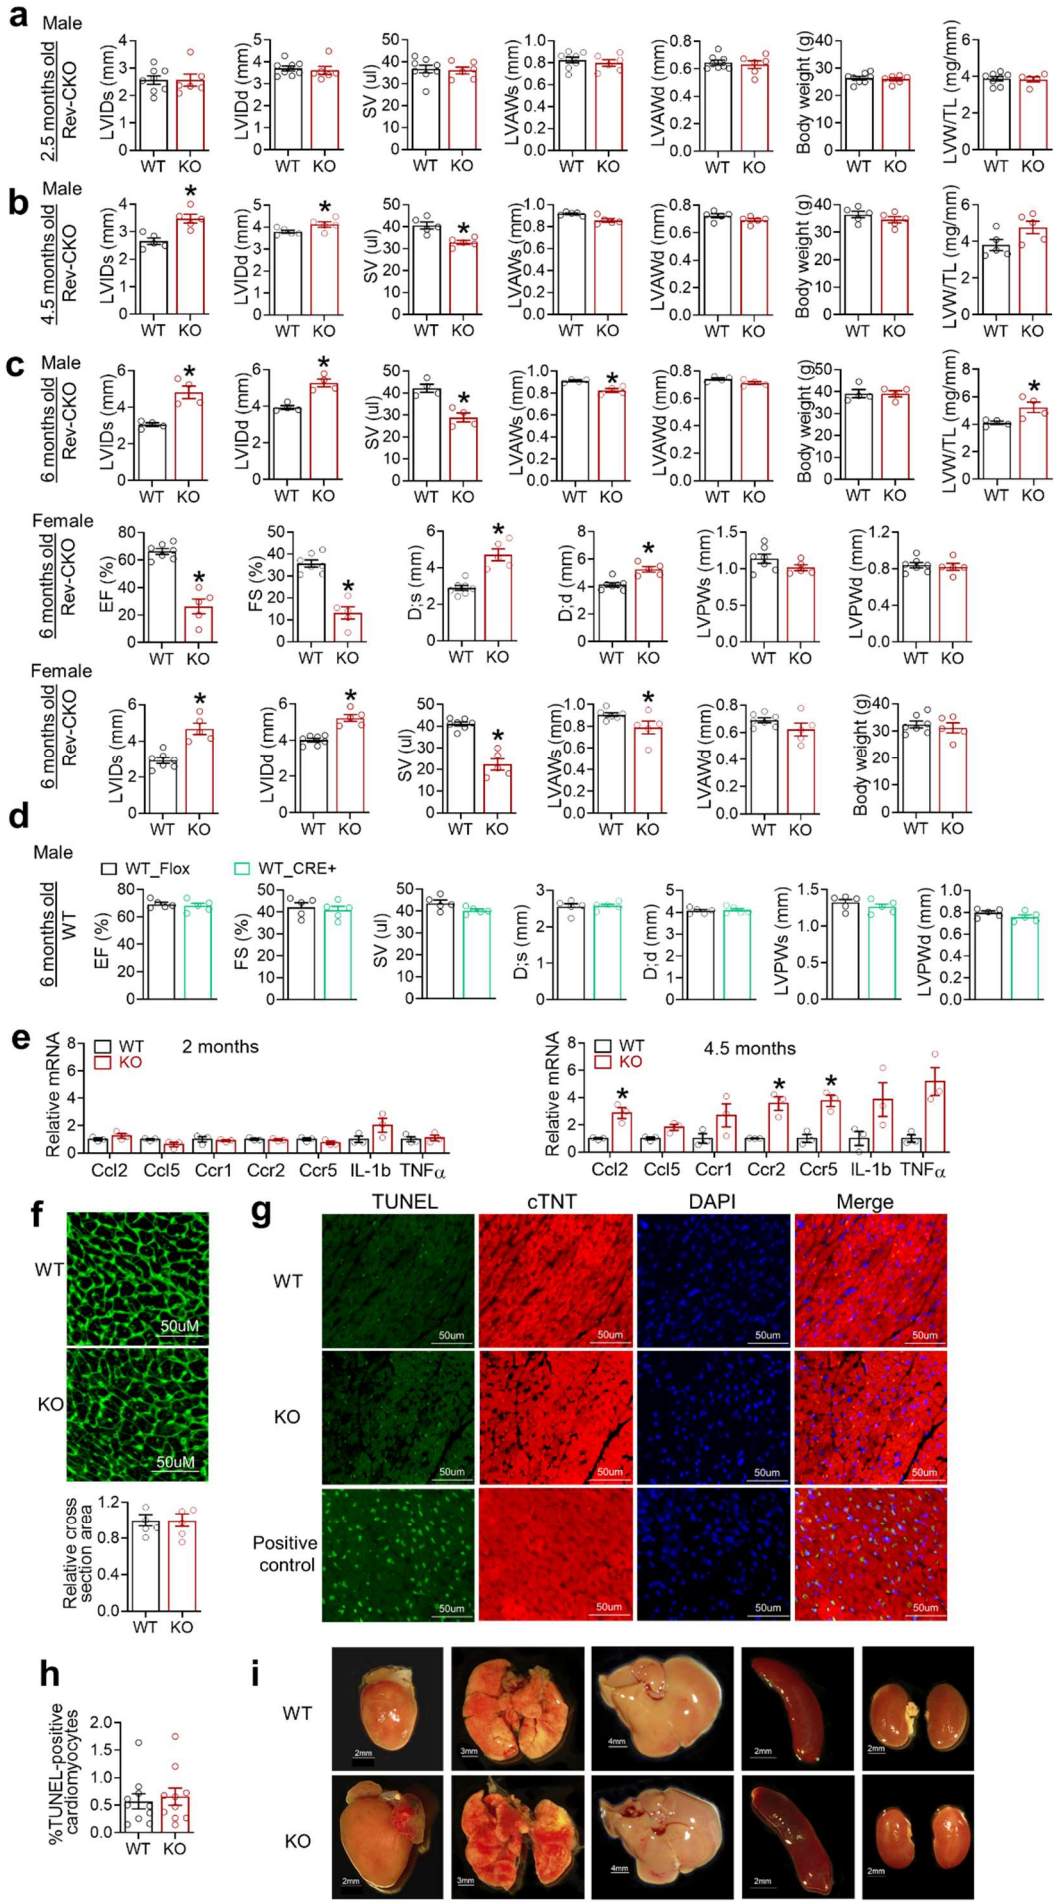

**Supplemental Figure S2. Cardiomyocyte-specific ablation of Rev-erb causes progressive heart failure.**

**(a)** Echocardiography analysis, body weight and left ventricular weight (LVW) to tibia length (TL) ratio in male mice at 2.5 months, n = 8 mice for WT and n = 6 mice for KO. LVIDs, left ventricular internal dimension at end-systole. LVIDd, left ventricular internal dimension at end-diastole. SV, stroke volume. LVAWs, left ventricular anterior wall thickness at end-systole. LVAWd, left ventricular anterior wall thickness at end-diastole. **(b)** Echocardiography analysis, body weight and LVW/TL ratio in male mice at 4.5 months, n = 5 mice. **(c)** Echocardiography analysis, body weight and LVW/TL ratio in male or female mice at 6 months, n = 4 for male mice, n ≥ 5 for female mice. **(d)** Echocardiography analysis of WT flox/flox (WT\_Flox) and WT αMHC-Cre (WT\_CRE+) male mice at 6 months of age, n = 5 mice. **(e)** RT-qPCR analysis of the heart in male mice at 2 months of age and 4.5 months of age at ZT10, n = 3 mice. **(f)** Representative picture and the quantification analysis of immunostaining for wheat germ agglutinin (WGA) in male mice at 2.5 months old. Each quantification value dot represents the average value of three fields on one section. 3 mice were used for each group. **(g-h)** TUNEL assay in male mice at 2.5 months old. Sections were co-stained with cardiomyocyte marker cardiac troponin T (cTNT) and DAPI. Incubation of sections with DNase I served as the positive control. Each quantification value dot represents the average value of three fields on one section. 3 mice were used for each group. **(i)** Post-mortem pictures. The sample size is indicated in the figure. Each dot represents an individual mouse, unless otherwise stated. Data are mean ± S.E.M. \* p < 0.05 between groups by two-sided t-test.

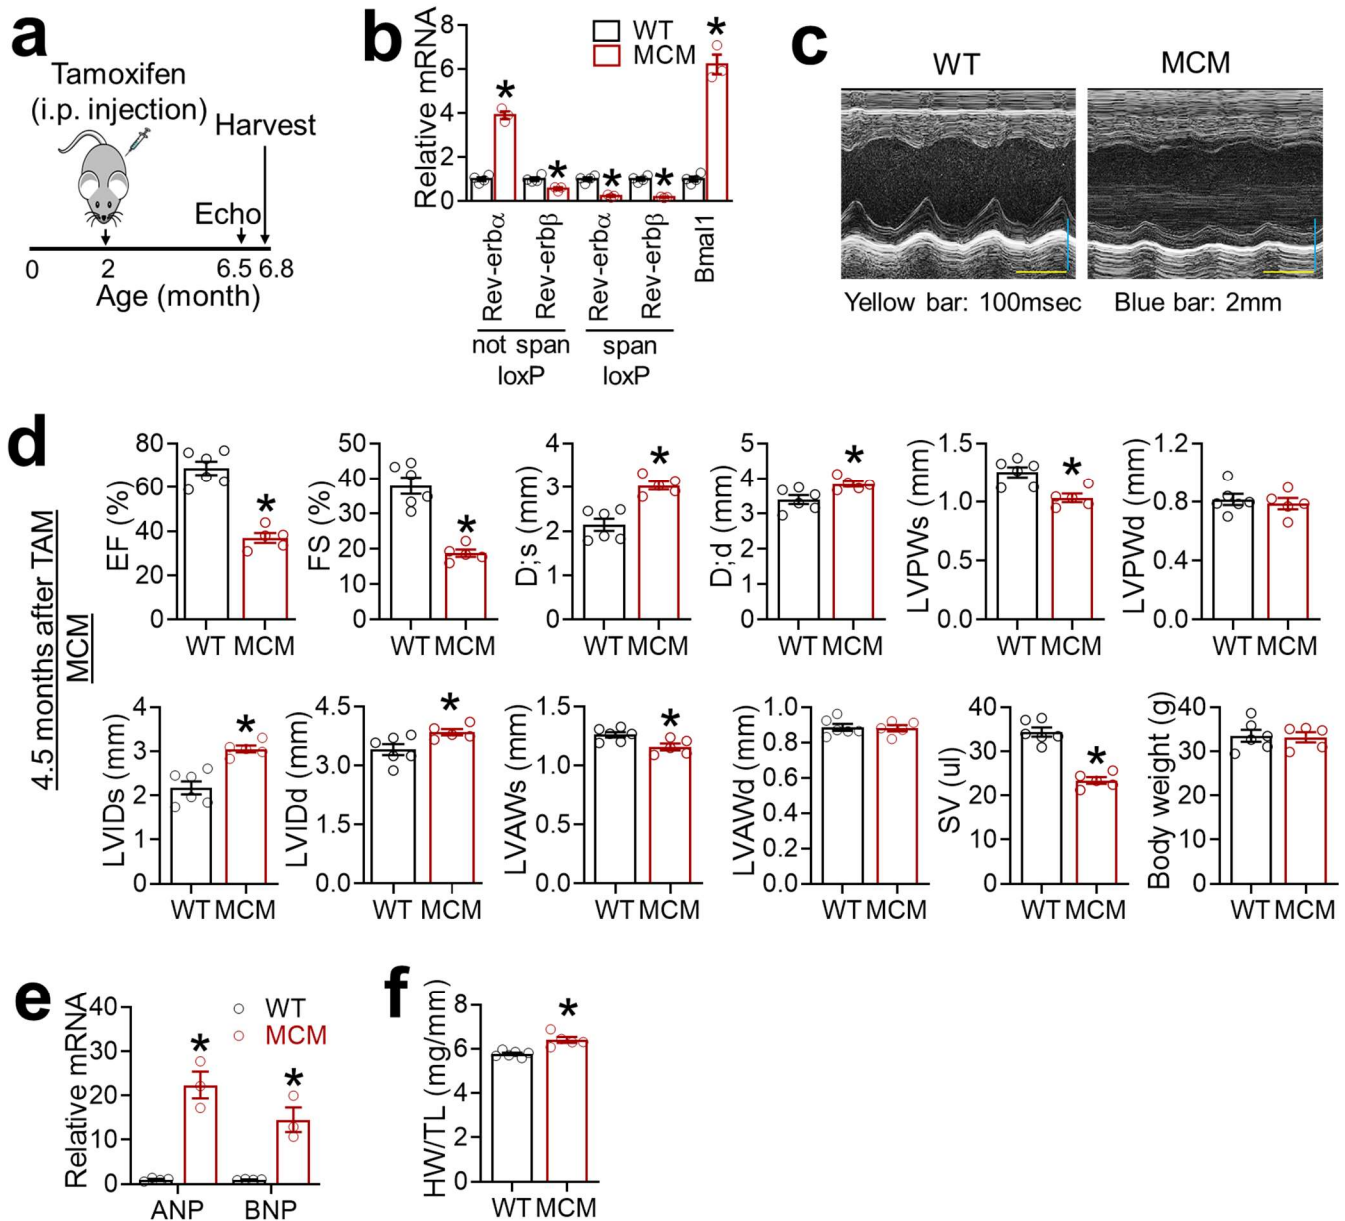

**Supplemental Figure S3. Inducible ablation of Rev-erb in adult mice causes progressive heart failure.** (a) Schematic view of tamoxifen administration and experiment timeline in MCM mice. (b) RT-qPCR analysis of the heart in WT and MCM male mice at 4.8 months after tamoxifen administration using primer pairs that either span or not span the floxed exons in Rev-erb $\alpha$  and Rev-erb $\beta$ ,  $n = 3$  mice. (c) Representative M mode images of echocardiography analysis in WT and MCM male mice at 4.5 months after Cre activation. (d) Echocardiography analysis in WT and MCM male mice at 4.5 months after tamoxifen administration,  $n = 6$  mice for WT and  $n = 5$  mice for MCM. (e) RT-qPCR analysis of the heart in WT and MCM male mice at 4.8 months after Cre activation,  $n = 4$  mice for WT and  $n = 3$  mice for MCM. (f) Heart weight (HW) to tibia length (TL) ratio in WT and MCM male mice at 4.8 months after Cre activation,  $n = 6$  mice for WT and  $n = 5$  mice for MCM. The sample size is indicated in the figure. Each dot represents an individual mouse. Data are mean  $\pm$  S.E.M. \*  $p < 0.05$  between groups by two-sided  $t$ -test.



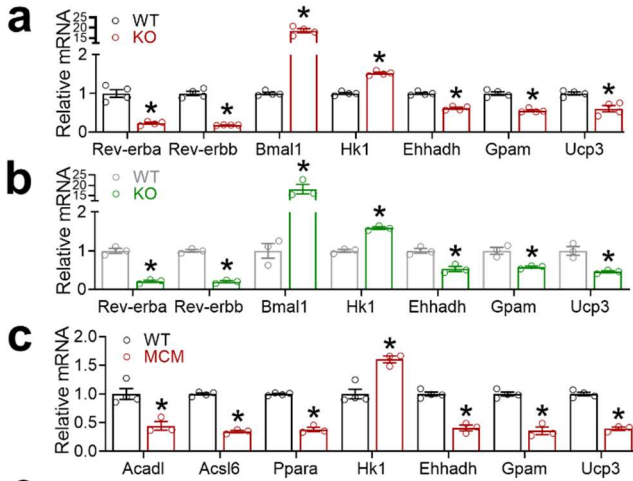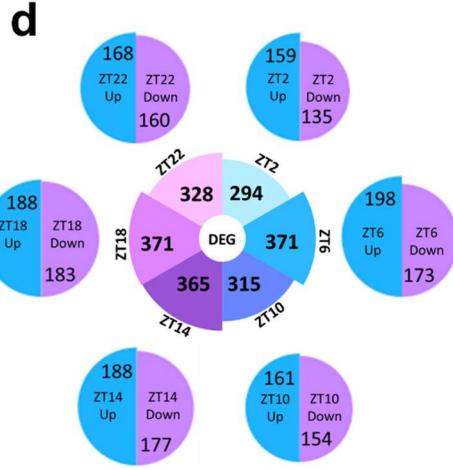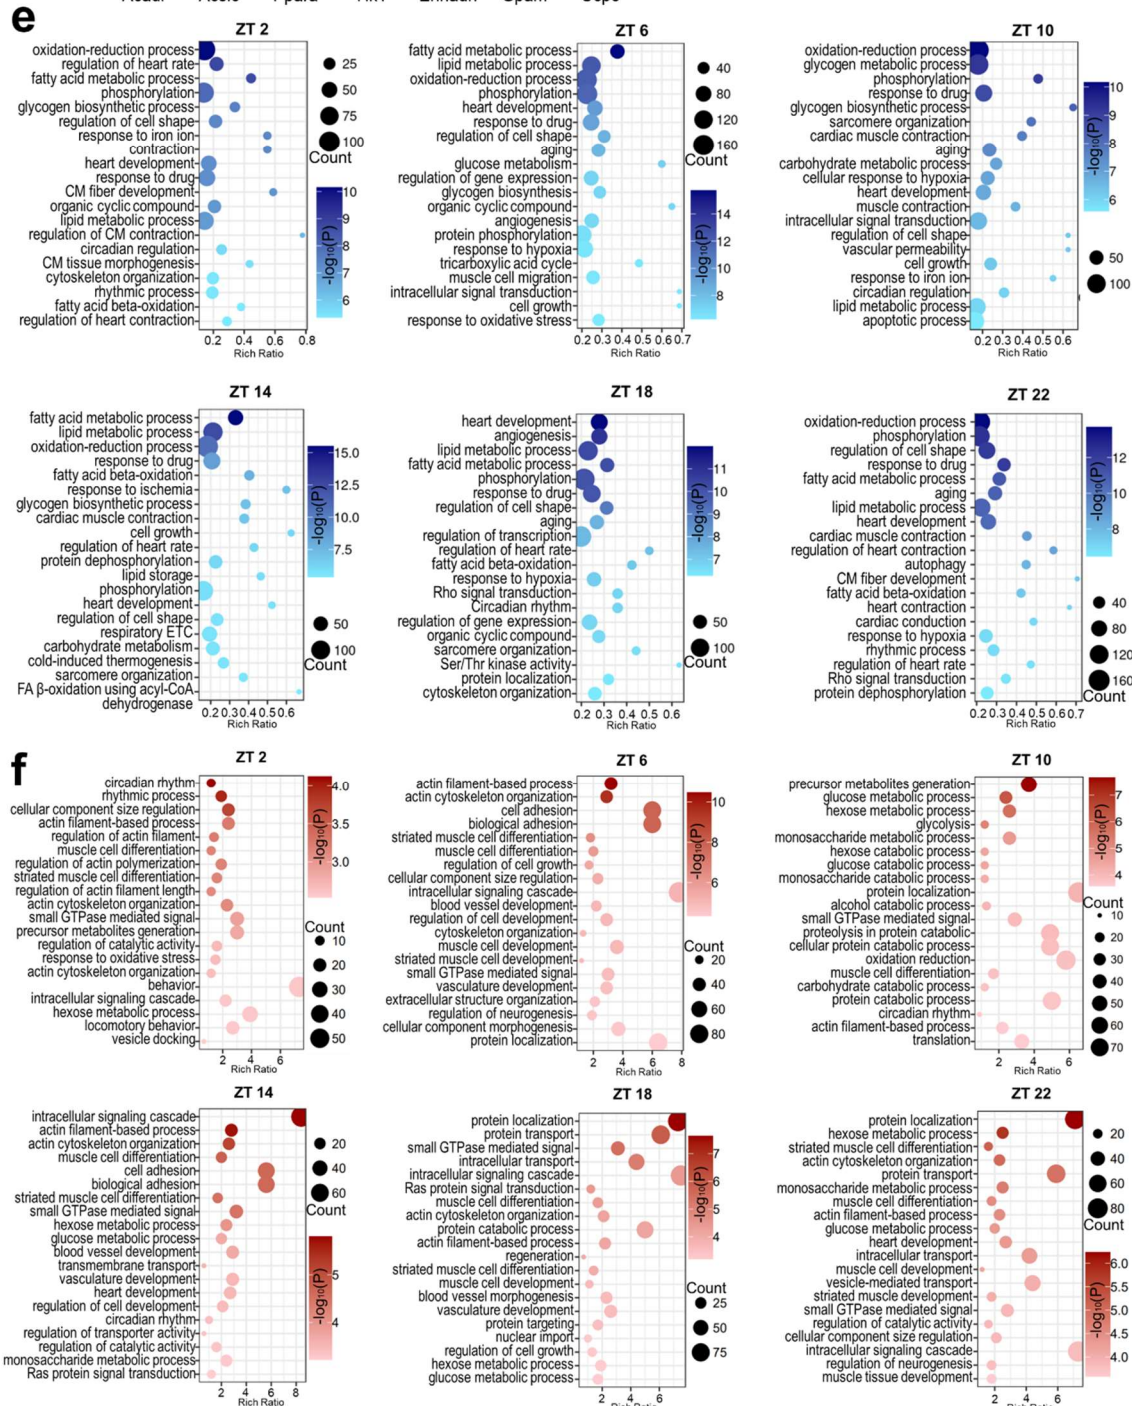

**Supplemental Figure S4. Transcriptomic analyses of Rev-erb function in the heart.**

**(a)** RT-qPCR analysis of the snap-frozen heart tissues in WT and KO male mice at 2 months of age at Zeitgeber time ZT10, n = 4 mice. **(b)** RT-qPCR analysis of cardiomyocytes isolated from male mice at 2 months of age at ZT10, n = 3 mice. **(c)** RT-qPCR analysis of the snap-frozen heart tissues in WT and MCM male mice at 4.8 months after tamoxifen administration (6.8 months of age) at ZT10, n = 3 mice. **(d)** Differentially expressed genes (DEGs) in KO vs. WT at each ZT. DEGs cut-offs:  $q < 0.05$  and  $|\text{Log}_2\text{Fold-Change}| > 1$ . **(e)** Top enriched biological process (BP) from GO analysis for downregulated DEGs ( $q < 0.05$ ) at each ZT. **(f)** Top enriched biological process (BP) from GO analysis for upregulated DEGs ( $q < 0.05$ ) at each ZT. Data are mean  $\pm$  S.E.M. \*  $p < 0.05$  compared to the control group by two-sided *t*-test.

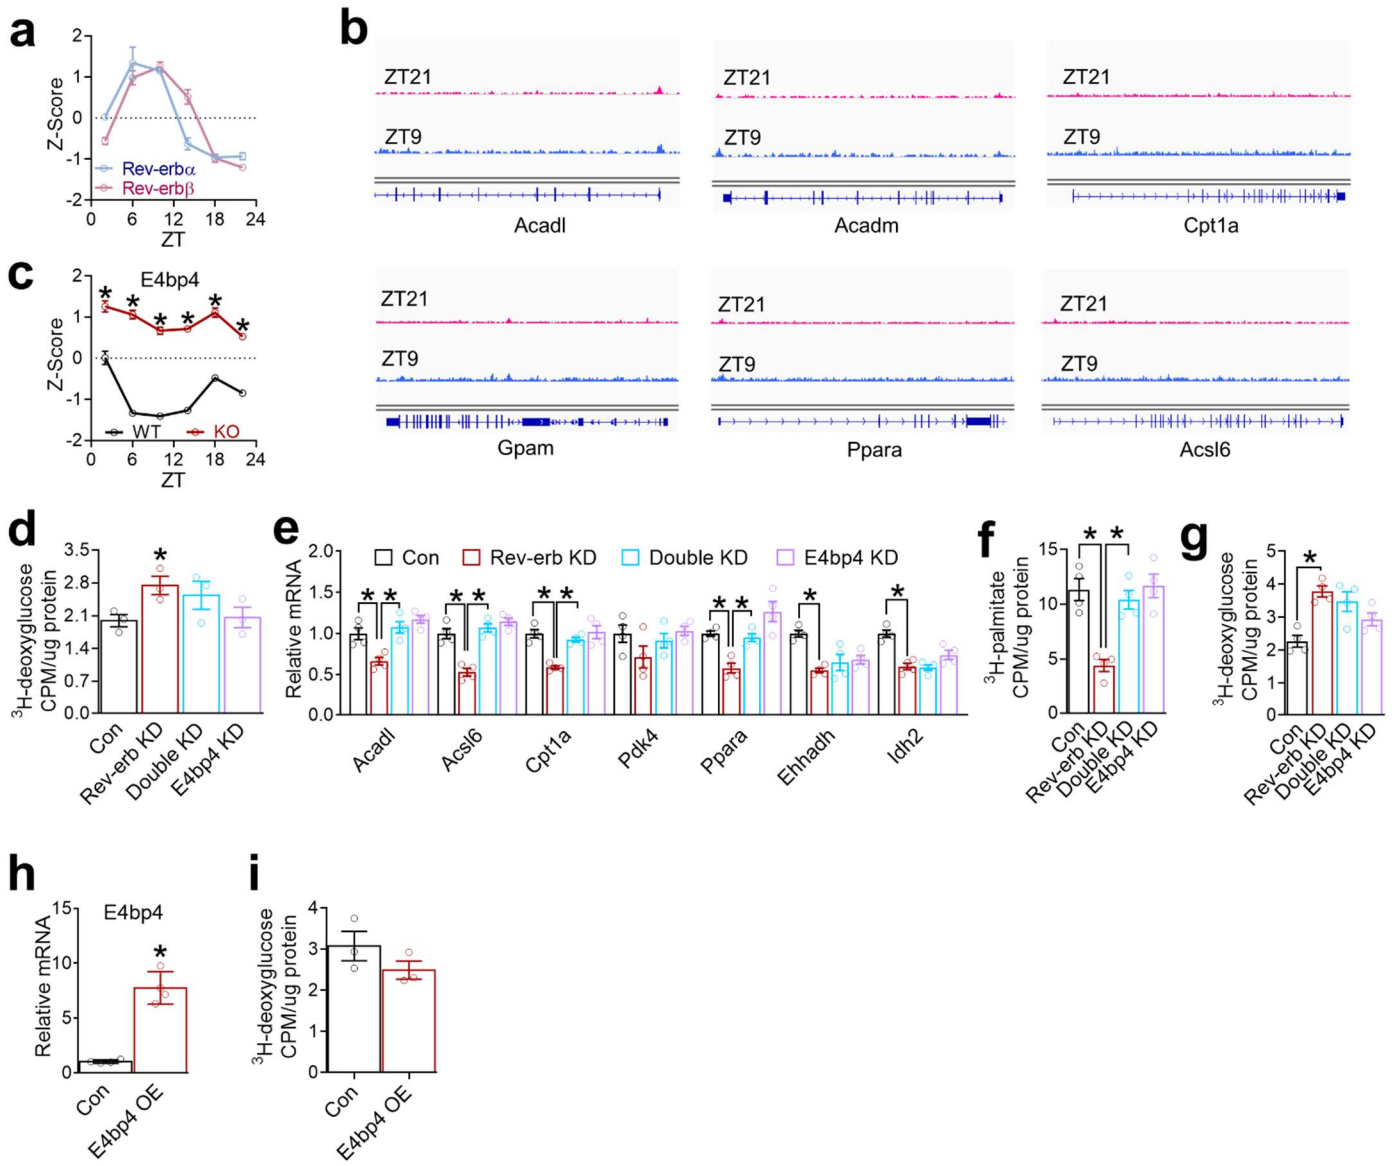

**Supplemental Figure S5. E4bp4 contributes to Rev-erb-mediated cardiac transcription regulation.**

(a) Relative expression levels across different ZTs for Rev-erb $\alpha$ , Rev-erb $\beta$  in the WT hearts based on the RNA-seq data, n = 3 mice. (b) Examples of Rev-erb $\alpha$  binding peaks at ZT21 and ZT9. (c) Relative expression levels of E4bp4 in the WT and KO hearts based on the RNA-seq data, n = 3 mice. \* adjusted p < 0.05 by two-way ANOVA with Bonferroni's multiple comparisons test. (d) Glucose uptake in AC16 cells after knockdown of Rev-erb (Rev-erb KD) or E4bp4 (E4bp4 KD) or both (Double KD). Each dot represents an independent well of cells. (e) RT-qPCR analysis of primary adult mouse cardiomyocytes after siRNA-mediated knockdown of Rev-erb (Rev-erb KD) or E4bp4 (E4bp4 KD) or both (Double KD), n = 4 mice. (f) FAO rate in primary adult mouse cardiomyocytes, n = 4 mice. (g) Glucose uptake assay in primary adult mouse cardiomyocytes, n = 4 mice. (h) RT-qPCR analysis in AC16 cells with E4bp4 overexpression (E4bp4 OE), each dot represents an independent well of cells. (i) Glucose uptake assay in AC16 cells with E4bp4 overexpression (E4bp4 OE), each dot represents an independent well of cells. Data are mean  $\pm$  S.E.M. \* p < 0.05 compared to the control group by two-sided t-test unless otherwise stated.

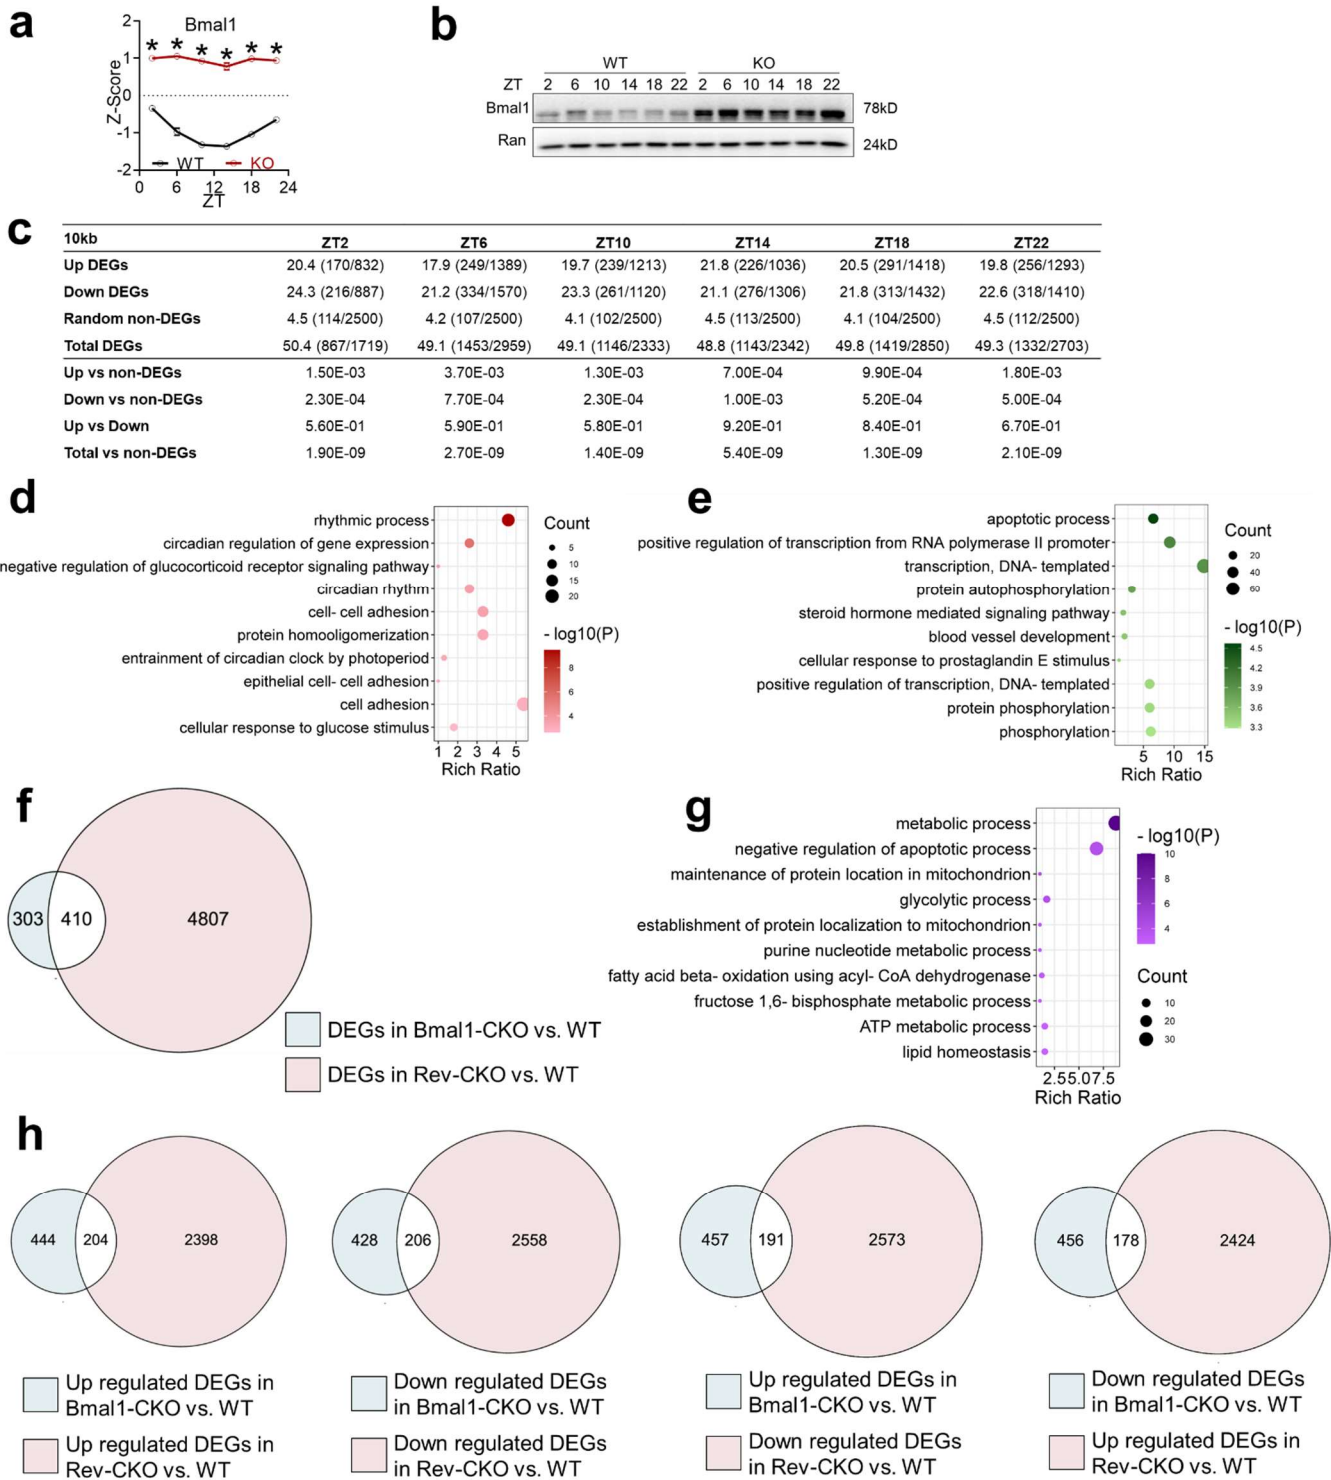

### Supplemental Figure S6. Potential role of Bmal1 in Rev-erb-mediated cardiac transcription regulation.

(a) Relative expression levels of Bmal1 in WT and KO heart based on the RNA-seq data,  $n = 3$  mice. \* adjusted  $p < 0.05$  by two-way ANOVA with Bonferroni's multiple comparisons test. (b) Western blot analysis of Bmal1 in WT and KO hearts. (c) Percentile enrichment (# of peaks / # of DEGs X 100) of Bmal1 ChIP-seq peaks (GSE110602) within 10kb of the transcription start sites (TSSs) of DEGs in Rev-CKO vs. WT mice at the indicated ZTs. P-value by Chi-square test. (d) Top enriched biological process (BP) from GO analysis for upregulated DEGs in Rev-CKO vs. WT mice with Bmal1 ChIP-seq peaks within 10kb of TSSs. (e) Top enriched biological process (BP) from GO analysis for upregulated DEGs in Rev-CKO vs. WT mice with Bmal1 ChIP-seq peaks within 10kb of TSSs. (f) Overlap of DEGs from Bmal1-CKO vs. WT hearts (GSE43073) and DEGs of Rev-CKO vs. WT hearts. (g) Top enriched biological process (BP) from GO analysis for overlapped DEGs in f. (h) Stratified overlap between DEGs in Bmal1-CKO and Rev-CKO hearts compared to their respective controls.



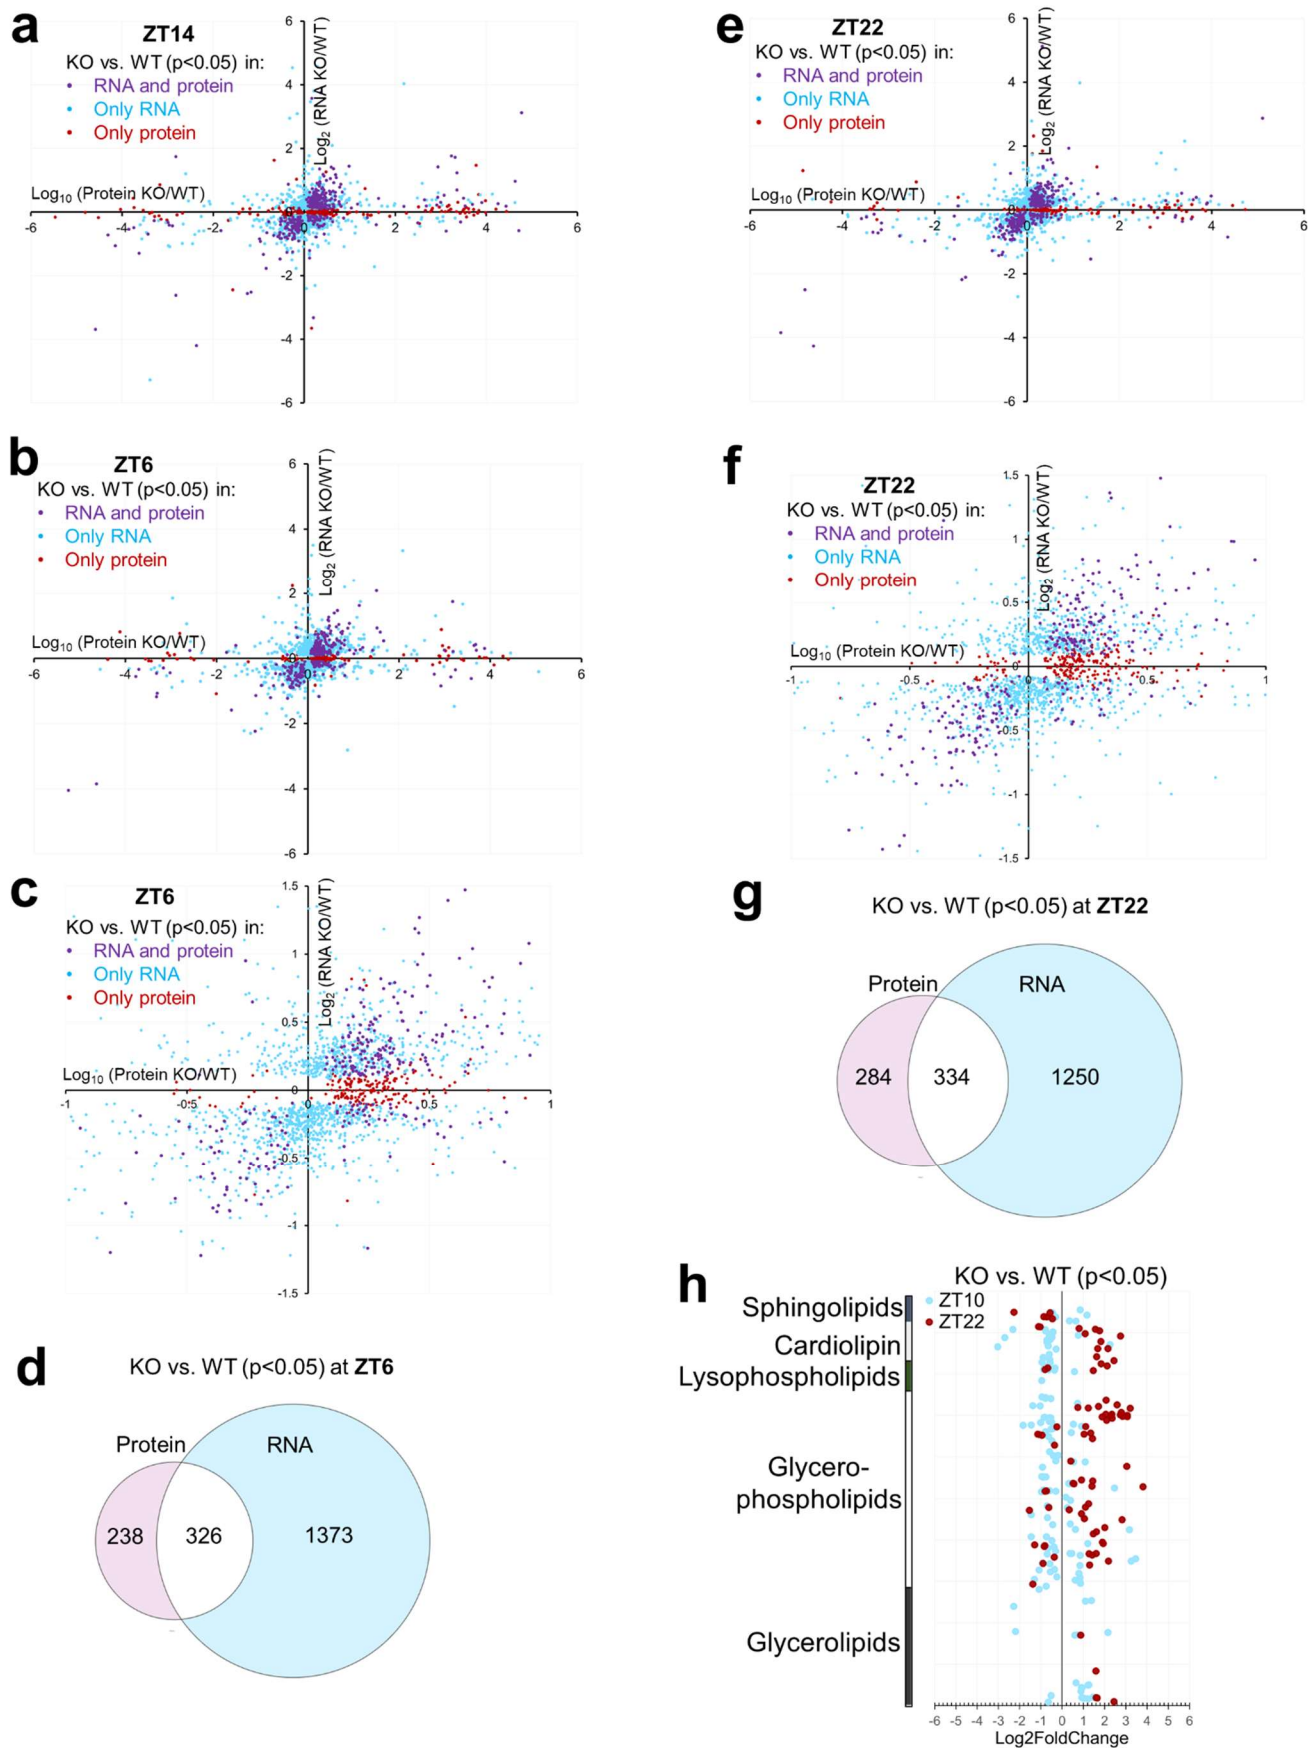

**Supplemental Figure S7. Integrated transcriptomics, proteomics, and lipidomics analysis.**

(a-g) Correlation and overlap of the DEGs and DEPs (KO vs. WT) at the indicated ZTs using  $p < 0.05$  as the cut-off for both RNA and protein. (h) Cardiac lipid species with differential levels for the indicated comparisons,  $n = 3$  mice for each genotype at the indicated ZT.

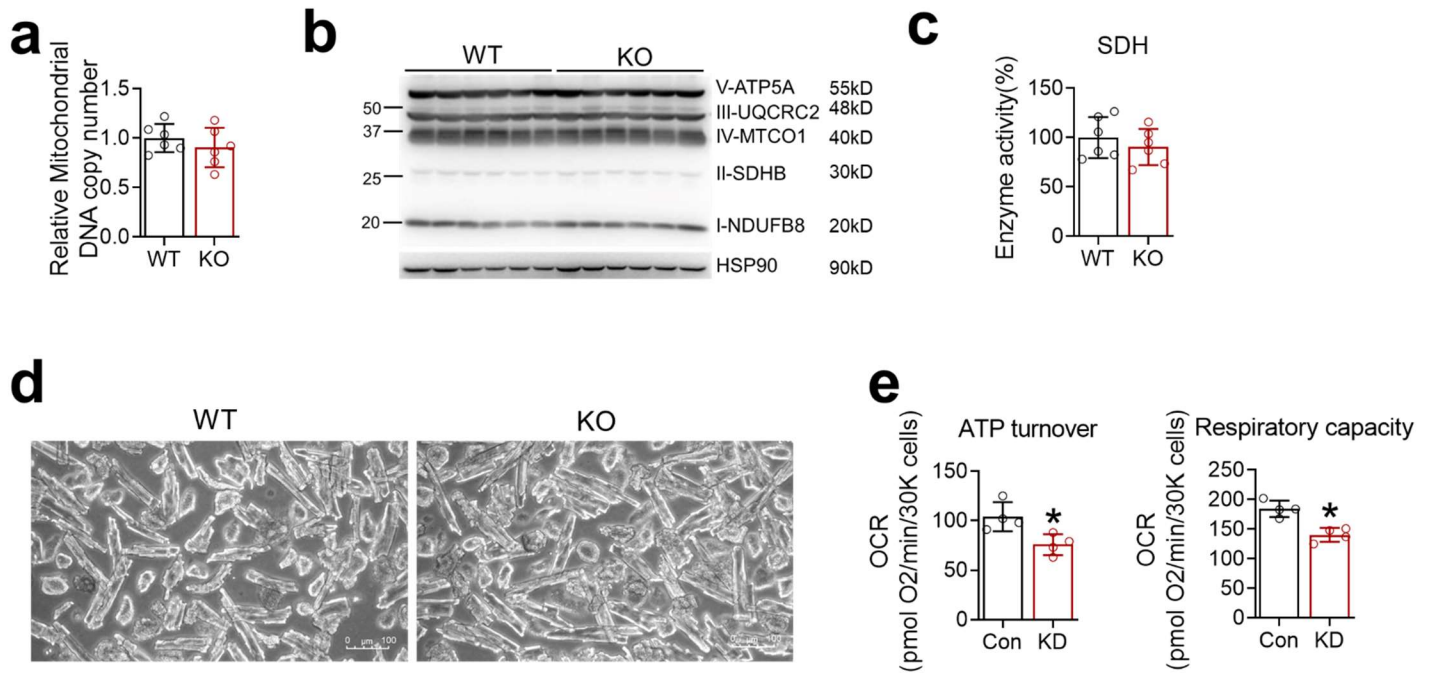

**Supplemental Figure S8. Cardiac Rev-erb regulates the diurnal rhythm of myocardial metabolism.**

(a) Mitochondrial DNA copy number quantification by qPCR in the WT and KO hearts, n = 6 mice. The quantification of the mitochondrial gene mtCO1 was normalized to a nuclear gene Ndufv1. (b) Western blot analysis of mitochondrial OXPHOS protein complexes, n = 6 mice. (c) Enzymatic activity of the succinate dehydrogenase (SDH) in the WT and KO hearts, n = 6 mice. (d) Microscopy images of primary cardiomyocytes isolated from adult mice. (e) Cellular respirometry analysis (Seahorse assay) of ATP turnover and respiratory capacity in AC16 cells transfected with siRNA to knockdown (KD) Rev-erb or control siRNA (Con), n = 4 wells. Data are mean ± S.E.M. \* p < 0.05 between groups by two-sided *t*-test.

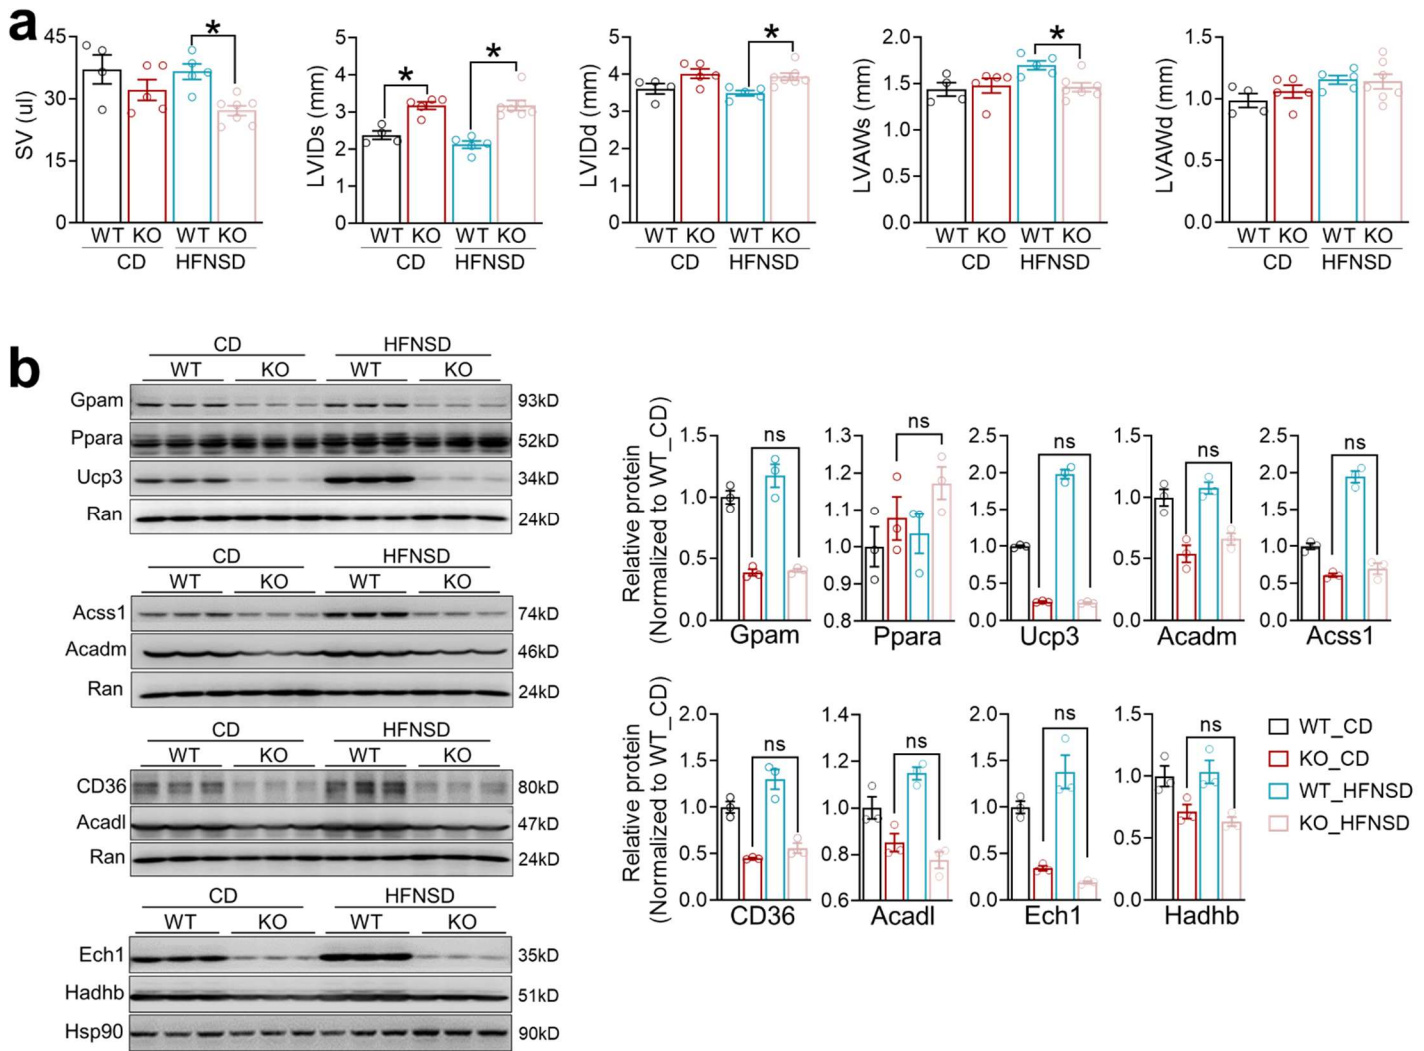

**Supplemental Figure S9. HFNSD does not modulate cardiac dysfunctions in Rev-CKO mice.**

(a) Echocardiography analysis on chow diet (CD) or high-fat no-sucrose diet (HFNSD) at 5 months of age in female mice,  $n \geq 4$  mice. (b) Western blot analysis of hearts in Rev-CKO and WT mice fed with CD or HFNSD,  $n = 3$  mice. Each dot represents an individual mouse. Data are mean  $\pm$  S.E.M. \*  $p < 0.05$  between groups by two-sided *t*-test.

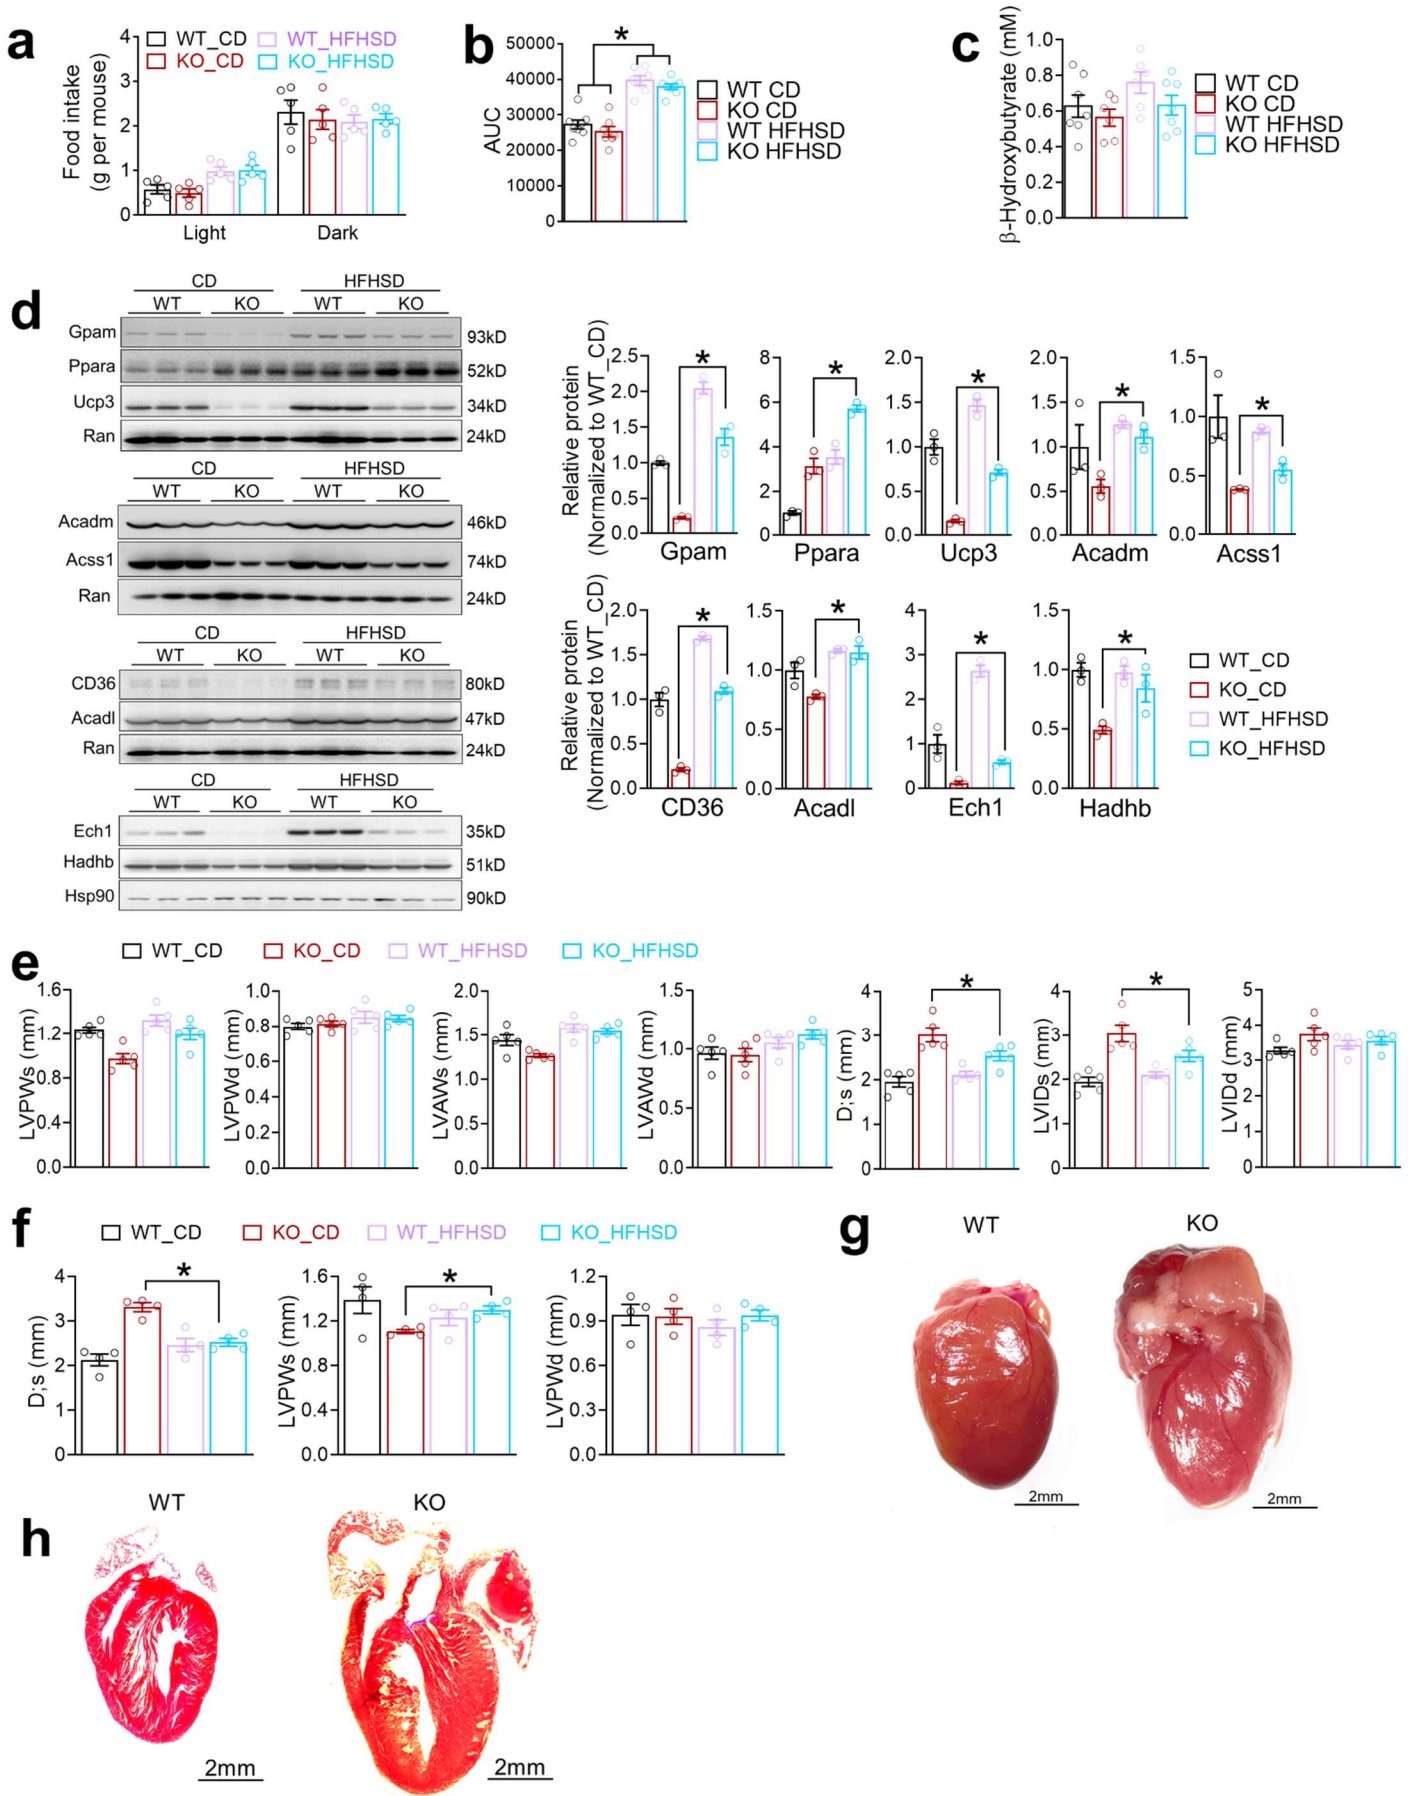

**Supplemental Figure S10. HFHSD modulates cardiac dysfunctions in Rev-CKO mice.**

**(a)** Food intake for female mice fed with either CD or HFHSD,  $n = 5$  mice. **(b)** The area under the curve (AUC) for GTT at the age of 5 months old,  $n \geq 6$  mice. **(c)** Blood ketone levels in female mice at 5 months old,  $n \geq 6$  mice. HFHSD started at 8 weeks of age. **(d)** Western blot analysis of hearts in Rev-CKO and WT mice fed with CD or HFHSD,  $n = 3$  mice. **(e)** Echocardiography analysis of female mice at 5 months of age on HFHSD,  $n = 5$  mice. HFHSD started at 8 weeks of age. **(f)** Echocardiography analysis of male mice at 4.5 months of age on HFHSD,  $n = 4$  mice. HFHSD started at 8 weeks of age. **(g-h)** Gross morphology and trichrome staining of the mouse heart harvest at 7.5 months of age on HFHSD. HFHSD started at 8 weeks of age. Each dot represents an individual mouse. Data are mean  $\pm$  S.E.M. \*  $p < 0.05$  between groups by two-sided  $t$ -test.



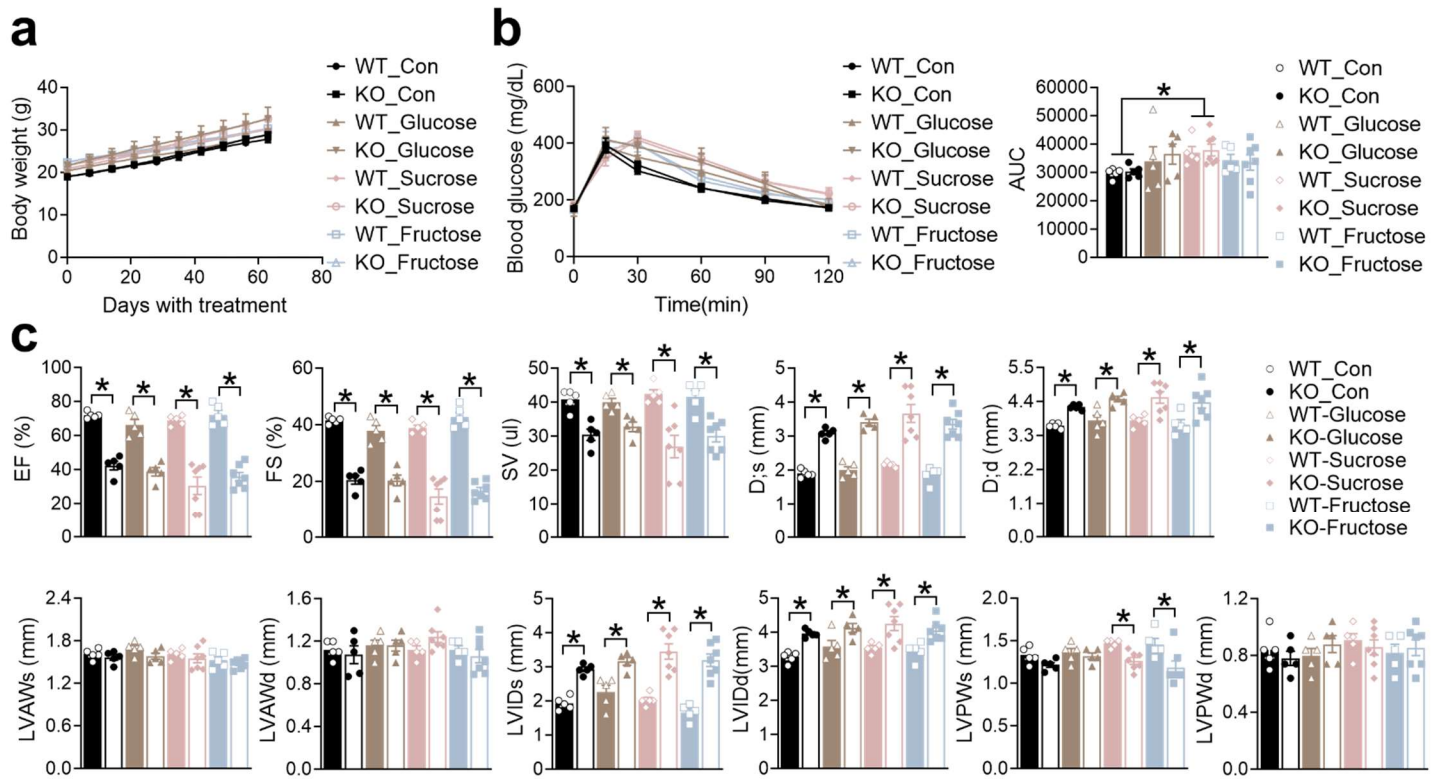

**Supplemental Figure S11. High-sugar diets do not ameliorate Rev-CKO cardiac dysfunctions.**

(a) Bodyweight gain in male mice drinking water containing 20% glucose, 20% sucrose, or 20% fructose,  $n \geq 5$  mice. The sugared water started at 8 weeks old. (b) GTT at 5 months of age,  $n \geq 5$  mice. (c) Echocardiography analysis of male mice at 5 months of age,  $n \geq 5$  mice. Data are mean  $\pm$  S.E.M. \*  $p < 0.05$  between indicated groups by two-sided  $t$ -test.

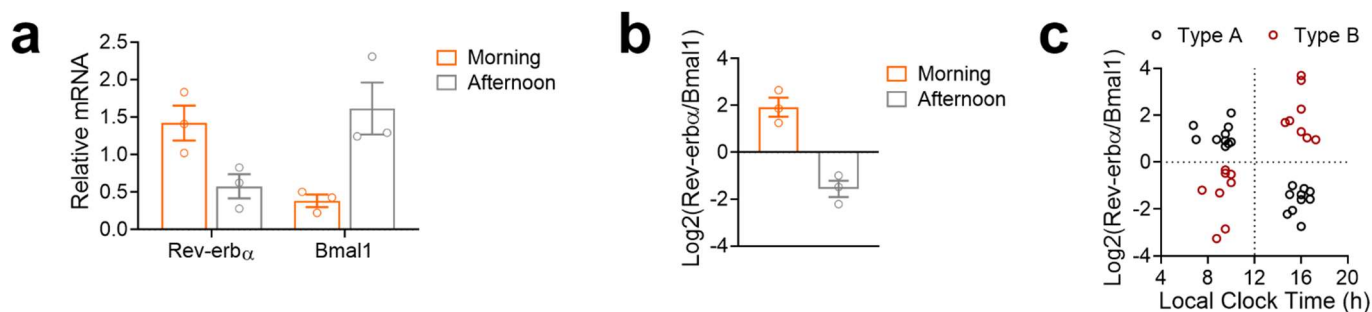

**Supplemental Figure S12. Molecular chronotypes of the cardiac molecular clock in human hearts.**

**(a)** RT-qPCR analysis of normal human hearts that were once considered for transplant donors,  $n=3$ . The relative level of Rev-erb $\alpha$  or Bmal1 in each sample was normalized to the housekeeping gene S18 RNA and was then further normalized to the average of all 6 normal heart samples. **(b)** The ratio of Rev-erb $\alpha$  or Bmal1 for each sample was calculated from the above values and transformed onto the log<sub>2</sub> scale,  $n=3$ . Data are mean  $\pm$  S.E.M. **(c)** Cardiac molecular chronotype was inferred from relative gene expression levels of Rev-erb $\alpha$  and Bmal1 in the failing hearts of patients who received heart transplants,  $n = 20$  patients for type A and  $n = 16$  patients for type B.



## Supplemental Tables

### Supplemental Table S1. Key resources table

| REAGENT or RESOURCE                            | SOURCE                   | IDENTIFIER         |
|------------------------------------------------|--------------------------|--------------------|
| Chemicals, Peptides, and Recombinant Proteins  |                          |                    |
| BCA protein assay kit                          | Thermo Fisher Scientific | Cat # A53225       |
| Immun-Blot® PVDF Membrane, 0.22 µm             | Bio-Rad Laboratories     | Cat # 1620177      |
| mouse anti-Rabbit IgG-HRP                      | Santa Cruz Biotechnology | Cat # sc-2357      |
| goat anti-mouse IgG-HRP                        | Santa Cruz Biotechnology | Cat # sc-2005      |
| cOmplete, EDT-free Protease Inhibitor Cocktail | Roche                    | Cat # 11873580001  |
| COLLAGENASE TYPE II                            | Thermo Fisher Scientific | Cat # 17101015     |
| Protease XIV (proteaseE)                       | Sigma                    | Cat # P5147        |
| Critical Commercial Assays                     |                          |                    |
| RNEASY MINI KIT                                | Qiagen                   | Cat # 74106        |
| High-Capacity cDNA Reverse Transcription Kit   | Thermo Fisher Scientific | Cat # 4368814      |
| SYBR™ Select Master Mix                        | Thermo Fisher Scientific | Cat # 4472919      |
| Isotope Tracer and Scintillation Liquid        |                          |                    |
| Deoxy-D-glucose, 2-[3H(N)]-, 250µCi (9.25MBq)  | Perkinelmer              | Cat # NET328250UC  |
| Palmitic Acid, [9,10-3H(N)]-, 1mCi (185MBq)    | Perkinelmer              | Cat # NET043005MC  |
| Glucose, D-[14C(U)], 250µCi (9.25MBq)          | Perkinelmer              | Cat # NEC042X250UC |
| Scintillation Liquid (Ultima Gold)             | Perkinelmer              | Cat # 6013326      |

**Supplemental Table S2. Diet composition.**

|                    |                          | <b>HFNSD</b><br>(D08060104) |             | <b>HFHSD</b><br>(D12492) |             | <b>CD</b><br>(3002906/5V5R) |          |
|--------------------|--------------------------|-----------------------------|-------------|--------------------------|-------------|-----------------------------|----------|
| Total Protein      |                          | 26 gm%                      | 20 kcal%    | 26 gm%                   | 20 kcal%    | 21 gm%                      | 23 kcal% |
| Total Carbohydrate |                          | 26 gm%                      | 20 kcal%    | 26 gm%                   | 20 kcal%    | 56 gm%                      | 62 kcal% |
| Total Fat          |                          | 35 gm%                      | 60 kcal%    | 35 gm%                   | 60 kcal%    | 13.5 gm%                    | 15 kcal% |
| Total Calorie      |                          | 5.24 kcal/gm                |             | 5.24 kcal/gm             |             | 3.43 kcal/gm                |          |
| <b>Ingredient</b>  |                          | <b>gm</b>                   | <b>kcal</b> | <b>gm</b>                | <b>kcal</b> |                             |          |
| Protein            | Casein, Lactic           | 200                         | 800         | 200                      | 800         |                             |          |
|                    | L-Cystine                | 3                           | 12          | 3                        | 12          |                             |          |
| Carbohydrate       | Corn Starch              | 68.8                        | 275         | 0                        | 0           |                             |          |
|                    | Maltodextrin 10          | 125                         | 500         | 125                      | 500         |                             |          |
|                    | Sucrose                  | 0                           | 0           | 68.8                     | 275         |                             |          |
|                    | Cellulose, BW200         | 50                          | 0           | 50                       | 0           |                             |          |
| Fat                | Soybean Oil              | 25                          | 225         | 25                       | 225         |                             |          |
|                    | Lard                     | 245                         | 2205        | 245                      | 2205        |                             |          |
| Other              | Mineral Mix S10026       | 10                          | 0           | 10                       | 0           |                             |          |
|                    | DiCalcium Phosphate      | 13                          | 0           | 13                       | 0           |                             |          |
|                    | Calcium Carbonate        | 5.5                         | 0           | 5.5                      | 0           |                             |          |
|                    | Potassium Citrate, 1 H2O | 16.5                        | 0           | 16.5                     | 0           |                             |          |
|                    | Vitamin Mix V10001       | 10                          | 40          | 10                       | 40          |                             |          |
|                    | Choline Bitartrate       | 2                           | 0           | 2                        | 0           |                             |          |
|                    | FD&C Yellow Dye #5       | 0.025                       | 0           | 0                        | 0           |                             |          |
|                    | FD&C Red Dye #40         | 0                           | 0           | 0                        | 0           |                             |          |
| FD&C Blue Dye #1   | 0.025                    | 0                           | 0.05        | 0                        |             |                             |          |
| <b>Total</b>       |                          | <b>773.85</b>               | <b>4057</b> | <b>773.85</b>            | <b>4057</b> |                             |          |

### **Supplemental Table S3. Inclusion and exclusion criteria for patient samples.**

---

#### **Inclusion criteria**

- 20 - 60 years old
- Dilated cardiomyopathy (DCM) by pathologic diagnosis

#### **Exclusion criteria**

- Familial DCM (at least one additional family member within the third-degree relatives was diagnosed with DCM) (PMID: 10099905)
  - Other known cardiovascular diseases including ischemic cardiomyopathy, congenital heart diseases, and valvular diseases
  - Systemic diseases
  - Diabetes or with antidiabetic treatment
  - Hypertension or with antihypertensive treatment
  - Atrial fibrillation or use of class III anti-arrhythmic drugs
  - Infectious diseases
  - Abnormal renal function with  $eGFR < 60 \text{ mL/min/1.73 m}^2$
  - History of drug or alcohol abuse or currently abusing alcohol or drugs
  - History of myocarditis
  - History of left ventricular assist device
-

**Supplemental Table S4. General characteristics of the patients.**

|                                              | Type A           | Type B           | P-value  |
|----------------------------------------------|------------------|------------------|----------|
| <b>Basic information</b>                     |                  |                  |          |
| Sample acquisition time (6-10AM/14-18PM)     | 10/10            | 8/8              | >0.999 * |
| Age (years)                                  | 42.10 (2.28)     | 46.94 (2.34)     | 0.151    |
| Sex ratio (male/female)                      | 16/4             | 14/2             | 0.672 *  |
| Body mass index (kg/m <sup>2</sup> )         | 22.09 (0.84)     | 23.45 (1.13)     | 0.332    |
| Diagnosis to transplantation (months)        | 6.23 (1.01)      | 6.13 (0.93)      | 0.941    |
| Heart rate (bpm)                             | 84.25 (3.83)     | 76.00 (4.27)     | 0.160    |
| Systolic blood pressure (mmHg)               | 96.30 (2.12)     | 101.63 (3.47)    | 0.181    |
| Diastolic blood pressure (mmHg)              | 69.10 (2.34)     | 70.63 (3.31)     | 0.702    |
| <b>Blood parameters</b>                      |                  |                  |          |
| Cholesterol (mmol/L)                         | 4.36 (0.19)      | 4.03 (0.30)      | 0.343    |
| Triglycerides (mmol/L)                       | 1.59 (0.19)      | 1.62 (0.37)      | 0.944    |
| HbA1c (%)                                    | 6.19 (0.19)      | 6.24 (0.22)      | 0.840    |
| Hemoglobin (g/L)                             | 141.00 (5.61)    | 133.60 (5.69)    | 0.370    |
| Creatine (umol/L)                            | 89.00 (3.60)     | 101.56 (6.31)    | 0.078    |
| Albumin (g/L)                                | 43.59 (1.76)     | 43.89 (2.74)     | 0.925    |
| NTproBNP (pg/ml)                             | 3232.58 (696.95) | 3002.96 (807.37) | 0.830    |
| Sodium (mmol/L)                              | 140.30 (0.93)    | 139.35 (0.64)    | 0.433    |
| Urea nitrogen (mmol/L)                       | 8.33 (0.69)      | 9.02 (0.76)      | 0.510    |
| Uric acid (umol/L)                           | 576.87 (42.92)   | 485.04 (60.79)   | 0.214    |
| AST (IU/L)                                   | 71.95 (27.93)    | 33.88 (10.00)    | 0.250    |
| ALT (IU/L)                                   | 90.70 (48.21)    | 44.19 (18.28)    | 0.416    |
| ALP (IU/L)                                   | 71.80 (6.24)     | 59.81 (4.10)     | 0.138    |
| CRP (mg/L)                                   | 5.72 (1.09)      | 4.21 (1.03)      | 0.330    |
| <b>Preoperative medication</b>               |                  |                  |          |
| ACEI/ARB (user/total)                        | 9/20             | 8/16             | >0.999 * |
| β-blocker (user/total)                       | 17/20            | 10/16            | 0.146 *  |
| Diuretics (user/total)                       | 15/20            | 12/16            | >0.999 * |
| <b>Cardiac status</b>                        |                  |                  |          |
| Heart function classification, NYHA (III/IV) | 6/14             | 8/8              | 0.307 *  |

HbA1c, glycosylated hemoglobin Type A1c. AST, glutamic oxaloacetic transaminase. ALT, alanine aminotransferase. ALP, Alkaline phosphatase. CRP, C-reactive protein CRP. ACEI/ARB, angiotensin converting enzyme inhibitors/angiotensin receptor blockers. Two-sided student t-test unless otherwise indicated. \* Fisher test.

**Supplemental Table S5. Cardiac functions in male patients only.**

|                                                      | Type A         | Type B         | P-value            | P-value regression <sup>†</sup> | P-value regression <sup>‡</sup> |
|------------------------------------------------------|----------------|----------------|--------------------|---------------------------------|---------------------------------|
| Age (years)                                          | 43.25 (2.58)   | 47.43 (2.60)   | 0.266              |                                 |                                 |
| Body mass index (kg/m <sup>2</sup> )                 | 22.75 (0.92)   | 23.33 (1.28)   | 0.713              |                                 |                                 |
| <b>Echocardiography</b>                              |                |                |                    |                                 |                                 |
| Mitral regurgitation (Mild: Moderate: Large)         | 6:7:2          | 1:3:8          | 0.005 <sup>#</sup> | 0.013                           | 0.009 <sup>&amp;</sup>          |
| Right atrial diameter, RAD (Normal/Enlarged)         | 11/4           | 5/8            | 0.125 <sup>*</sup> | 0.063                           | 0.063 <sup>&amp;</sup>          |
| Interventricular septum thickness, IVS (mm)          | 7.91 (0.19)    | 9.45 (0.37)    | 0.002              | 0.017                           | 0.001                           |
| Left ventricular end diastolic diameter, LVEDD (mm)  | 70.86 (2.32)   | 81.38 (1.94)   | 0.002              | 0.016                           | 0.004                           |
| Left atrial anteroposterior diameter, LAD (mm)       | 48.33 (1.68)   | 59.83 (3.35)   | 0.007              | 0.387                           | 0.005                           |
| Left ventricular posterior wall thickness, LVPW (mm) | 8.31 (0.26)    | 9.36 (0.41)    | 0.036              | 0.052                           | 0.045                           |
| Aortic sinus anteroposterior diameter (mm)           | 27.75 (2.09)   | 31.67 (1.33)   | 0.127              | 0.112                           | 0.138                           |
| Aortic annular diameter, AOD (mm)                    | 20.63 (0.94)   | 22.78 (0.85)   | 0.109              | 0.097                           | 0.110                           |
| Aortic valve systolic velocity (cm/s)                | 0.92 (0.08)    | 0.83 (0.07)    | 0.392              | 0.368                           | 0.296                           |
| Aortic valve systolic pressure difference (mmHG)     | 3.62 (0.63)    | 2.93 (0.50)    | 0.404              | 0.381                           | 0.315                           |
| Left ventricular ejection fraction, LVEF (%)         | 23.31 (1.16)   | 26.14 (2.07)   | 0.229              | 0.215                           | 0.375                           |
| Ascending aorta diameter (mm)                        | 26.14 (1.15)   | 30.58 (1.39)   | 0.020              | 0.036                           | 0.011                           |
| Tricuspid valve diastolic pressure difference (mmHG) | 1.31 (0.23)    | 1.71 (0.35)    | 0.331              | 0.305                           | 0.322                           |
| Tricuspid valve diastolic velocity (cm/s)            | 0.55 (0.05)    | 0.63 (0.06)    | 0.310              | 0.285                           | 0.315                           |
| Mitral valve diastolic velocity (cm/s)               | 1.18 (0.27)    | 1.04 (0.09)    | 0.620              | 0.625                           | 0.598                           |
| Main pulmonary diameter (mm)                         | 23.88 (1.19)   | 28.17 (1.51)   | 0.043              | 0.068                           | 0.069                           |
| Pulmonary valve systolic velocity (cm/s)             | 0.67 (0.03)    | 0.67 (0.12)    | 0.980              | 0.972                           | 0.994                           |
| Tricuspid valve systolic velocity (cm/s)             | 3.00 (0.11)    | 2.74 (0.24)    | 0.341              | 0.312                           | 0.548                           |
| Mitral valve diastolic pressure difference (mmHG)    | 3.93 (0.70)    | 4.62 (0.76)    | 0.516              | 0.493                           | 0.653                           |
| Tricuspid valve systolic pressure difference (mmHG)  | 36.45 (2.55)   | 32.33 (3.91)   | 0.387              | 0.363                           | 0.597                           |
| Right ventricular anteroposterior diameter, RVD (mm) | 26.75 (1.86)   | 26.91 (1.40)   | 0.947              | 0.944                           | 0.884                           |
| Pulmonary valve systolic pressure difference (mmHG)  | 1.84 (0.19)    | 2.10 (0.78)    | 0.758              | 0.666                           | 0.663                           |
| <b>MRI</b>                                           |                |                |                    |                                 |                                 |
| Left ventricular end diastolic diameter, LVEDD (mm)  | 76.46 (2.00)   | 86.10 (2.04)   | 0.003              | 0.015                           | 0.002                           |
| Left atrium anteroposterior diameter, LAD (mm)       | 43.46 (2.46)   | 55.90 (3.12)   | 0.005              | 0.017                           | 0.005                           |
| Left ventricular end diastolic volume, LVEDV (ml)    | 258.55 (11.46) | 393.70 (66.79) | 0.099              | 0.067                           | 0.028                           |
| Cardiac output (L/min)                               | 4.41 (0.58)    | 4.95 (0.80)    | 0.600              | 0.575                           | 0.646                           |
| Heart rate (bpm)                                     | 84.54 (5.32)   | 76.89 (2.32)   | 0.206              | 0.248                           | 0.305                           |
| Left ventricular ejection fraction, LVEF (%)         | 14.86 (1.44)   | 14.16 (1.18)   | 0.722              | 0.707                           | 0.601                           |

P-value: <sup>#</sup> Kruskal-Wallis rank-sum test; <sup>\*</sup> Fisher's exact test; two-sided student t-test for other parameters.

<sup>†</sup> P-value regression: P-value about the correlation between the molecular chronotype and the cardiac parameter in binary logistic regressions with the molecular chronotype as the dependent variable and age, BMI, and a cardiac parameter as 3 independent variables.

<sup>‡</sup> P-value regression: P-value about the correlation between the molecular chronotype and the cardiac parameter in linear regression models (unless otherwise indicated) with a cardiac parameter as the dependent variable and age, BMI, and molecular chronotype as 3 independent variables. <sup>&</sup> Logistic regressions were performed for these parameters. For mitral regurgitation, 'Mild' and 'Moderate' were combined as a single category

## Supplemental Table S6. Statistical details.

| Figures                | Statistical test                                          | Comparisons     | p-value  |
|------------------------|-----------------------------------------------------------|-----------------|----------|
| F1a 2.5 mon ECHO EF    | Unpaired t test                                           | KO vs. WT       | 0.7664   |
| F1a 2.5 mon ECHO FS    | Unpaired t test                                           | KO vs. WT       | 0.8068   |
| F1a 2.5 mon ECHO D;S   | Unpaired t test                                           | KO vs. WT       | 0.9366   |
| F1a 2.5 mon ECHO D;d   | Unpaired t test                                           | KO vs. WT       | 0.5366   |
| F1a 2.5 mon ECHO LVPWs | Unpaired t test                                           | KO vs. WT       | 0.1042   |
| F1a 2.5 mon ECHO LVPWd | Unpaired t test                                           | KO vs. WT       | 0.1921   |
| F1b 4.5mon ECHO EF     | Unpaired t test                                           | KO vs. WT       | <0.0001  |
| F1b 4.5mon ECHO FS     | Unpaired t test                                           | KO vs. WT       | <0.0001  |
| F1b 4.5mon ECHO D;s    | Unpaired t test                                           | KO vs. WT       | 0.0002   |
| F1b 4.5mon ECHO D;d    | Unpaired t test                                           | KO vs. WT       | 0.0042   |
| F1b 4.5mon ECHO LVPWs  | Unpaired t test                                           | KO vs. WT       | 0.3843   |
| F1b 4.5mon ECHO LVPWd  | Unpaired t test                                           | KO vs. WT       | 0.1766   |
| F1c 6mon ECHO EF       | Unpaired t test                                           | KO vs. WT       | <0.0001  |
| F1c 6mon ECHO FS       | Unpaired t test                                           | KO vs. WT       | 0.0003   |
| F1c 6mon ECHO D;s      | Unpaired t test                                           | KO vs. WT       | 0.0029   |
| F1c 6mon ECHO D;d      | Unpaired t test                                           | KO vs. WT       | 0.003    |
| F1c 6mon ECHO LVPWs    | Unpaired t test                                           | KO vs. WT       | 0.1426   |
| F1c 6mon ECHO LVPWd    | Unpaired t test                                           | KO vs. WT       | 0.9613   |
| F1e RT-qPCR_ANP&BNP    | Unpaired t test                                           | ANP: KO vs. WT  | 0.00096  |
| F1e RT-qPCR_ANP&BNP    | Unpaired t test                                           | BNP: KO vs. WT  | 0.001022 |
| F1f HW/TL              | Unpaired t test                                           | KO vs. WT       | 0.0241   |
| F1i Survival           | Log-rank (Mantel-Cox) test                                | KO vs. WT       | <0.0001  |
| F2g Acadl              | Two-way ANOVA with Bonferroni's multiple comparisons test | ZT2: KO vs. WT  | 0.0644   |
|                        |                                                           | ZT6: KO vs. WT  | 0.0046   |
|                        |                                                           | ZT10: KO vs. WT | 0.034    |
|                        |                                                           | ZT14: KO vs. WT | 0.0015   |
|                        |                                                           | ZT18: KO vs. WT | 0.0453   |
| F2g Cpt1a              | Two-way ANOVA with Bonferroni's multiple comparisons test | ZT22: KO vs. WT | 0.0081   |
|                        |                                                           | ZT2: KO vs. WT  | 0.2137   |
|                        |                                                           | ZT6: KO vs. WT  | 0.1427   |
|                        |                                                           | ZT10: KO vs. WT | 0.0156   |
|                        |                                                           | ZT14: KO vs. WT | 0.0695   |
| F2g Hadhb              | Two-way ANOVA with Bonferroni's multiple comparisons test | ZT18: KO vs. WT | 0.0543   |
|                        |                                                           | ZT22: KO vs. WT | 0.1075   |
|                        |                                                           | ZT2: KO vs. WT  | 0.776    |
|                        |                                                           | ZT6: KO vs. WT  | 0.056    |
|                        |                                                           | ZT10: KO vs. WT | 0.0889   |
| F2g Pdk1               | Two-way ANOVA with Bonferroni's multiple comparisons test | ZT14: KO vs. WT | 0.0298   |
|                        |                                                           | ZT18: KO vs. WT | >0.9999  |
|                        |                                                           | ZT22: KO vs. WT | 0.5269   |
|                        |                                                           | ZT2: KO vs. WT  | 0.359    |
|                        |                                                           | ZT6: KO vs. WT  | 0.0805   |
| F2g Acadsb             | Two-way ANOVA with Bonferroni's multiple comparisons test | ZT10: KO vs. WT | 0.0084   |
|                        |                                                           | ZT14: KO vs. WT | 0.0178   |
|                        |                                                           | ZT18: KO vs. WT | 0.022    |
|                        |                                                           | ZT22: KO vs. WT | 0.0038   |
|                        |                                                           | ZT2: KO vs. WT  | 0.4391   |
| F2g Acads              | Two-way ANOVA with Bonferroni's multiple comparisons test | ZT6: KO vs. WT  | 0.0105   |
|                        |                                                           | ZT10: KO vs. WT | 0.2291   |
|                        |                                                           | ZT14: KO vs. WT | 0.0186   |
|                        |                                                           | ZT18: KO vs. WT | 0.0009   |
|                        |                                                           | ZT22: KO vs. WT | 0.0934   |
| F2g Acadm              | Two-way ANOVA with Bonferroni's multiple comparisons test | ZT2: KO vs. WT  | 0.512    |
|                        |                                                           | ZT6: KO vs. WT  | 0.2873   |
|                        |                                                           | ZT10: KO vs. WT | 0.0356   |
|                        |                                                           | ZT14: KO vs. WT | 0.0179   |
|                        |                                                           | ZT18: KO vs. WT | 0.0399   |
| F2g Gpam               | Two-way ANOVA with Bonferroni's multiple comparisons test | ZT22: KO vs. WT | 0.0068   |
|                        |                                                           | ZT2: KO vs. WT  | 0.1709   |
|                        |                                                           | ZT6: KO vs. WT  | 0.0102   |
|                        |                                                           | ZT10: KO vs. WT | 0.0421   |
|                        |                                                           | ZT14: KO vs. WT | 0.014    |
| F2g Acox1              | Two-way ANOVA with Bonferroni's multiple comparisons test | ZT18: KO vs. WT | 0.0137   |
|                        |                                                           | ZT22: KO vs. WT | 0.0329   |
|                        |                                                           | ZT2: KO vs. WT  | 0.5025   |
|                        |                                                           | ZT6: KO vs. WT  | 0.0819   |
|                        |                                                           | ZT10: KO vs. WT | 0.0157   |
| F2g Abcd3              | Two-way ANOVA with Bonferroni's multiple comparisons test | ZT14: KO vs. WT | 0.0018   |
|                        |                                                           | ZT18: KO vs. WT | 0.0098   |
|                        |                                                           | ZT22: KO vs. WT | 0.0091   |
|                        |                                                           | ZT2: KO vs. WT  | 0.0001   |
|                        |                                                           | ZT6: KO vs. WT  | 0.0029   |
| F2g Abcd3              | Two-way ANOVA with Bonferroni's multiple comparisons test | ZT10: KO vs. WT | 0.0006   |
|                        |                                                           | ZT14: KO vs. WT | 0.0031   |
|                        |                                                           | ZT18: KO vs. WT | 0.0004   |
|                        |                                                           | ZT22: KO vs. WT | 0.0003   |
| F2g Abcd3              | Two-way ANOVA with Bonferroni's multiple comparisons test | ZT2: KO vs. WT  | 0.1112   |
|                        |                                                           | ZT6: KO vs. WT  | 0.0414   |

|                                     |                                                           |                                  |           |
|-------------------------------------|-----------------------------------------------------------|----------------------------------|-----------|
|                                     |                                                           | ZT10: KO vs. WT                  | 0.1709    |
|                                     |                                                           | ZT14: KO vs. WT                  | 0.0167    |
|                                     |                                                           | ZT18: KO vs. WT                  | 0.0162    |
|                                     |                                                           | ZT22: KO vs. WT                  | 0.0347    |
| F2g Acat1                           | Two-way ANOVA with Bonferroni's multiple comparisons test | ZT2: KO vs. WT                   | 0.2026    |
|                                     |                                                           | ZT6: KO vs. WT                   | 0.0095    |
|                                     |                                                           | ZT10: KO vs. WT                  | 0.211     |
|                                     |                                                           | ZT14: KO vs. WT                  | 0.0475    |
|                                     |                                                           | ZT18: KO vs. WT                  | 0.192     |
|                                     |                                                           | ZT22: KO vs. WT                  | 0.0028    |
| F2g Decr1                           | Two-way ANOVA with Bonferroni's multiple comparisons test | ZT2: KO vs. WT                   | 0.2012    |
|                                     |                                                           | ZT6: KO vs. WT                   | 0.001     |
|                                     |                                                           | ZT10: KO vs. WT                  | 0.0297    |
|                                     |                                                           | ZT14: KO vs. WT                  | 0.002     |
|                                     |                                                           | ZT18: KO vs. WT                  | 0.0204    |
|                                     |                                                           | ZT22: KO vs. WT                  | 0.0003    |
| F2g Gck                             | Two-way ANOVA with Bonferroni's multiple comparisons test | ZT2: KO vs. WT                   | 0.067     |
|                                     |                                                           | ZT6: KO vs. WT                   | 0.2974    |
|                                     |                                                           | ZT10: KO vs. WT                  | 0.0063    |
|                                     |                                                           | ZT14: KO vs. WT                  | 0.0966    |
|                                     |                                                           | ZT18: KO vs. WT                  | 0.0037    |
|                                     |                                                           | ZT22: KO vs. WT                  | 0.1411    |
| F2g HK1                             | Two-way ANOVA with Bonferroni's multiple comparisons test | ZT2: KO vs. WT                   | 0.082     |
|                                     |                                                           | ZT6: KO vs. WT                   | 0.013     |
|                                     |                                                           | ZT10: KO vs. WT                  | 0.0003    |
|                                     |                                                           | ZT14: KO vs. WT                  | 0.0007    |
|                                     |                                                           | ZT18: KO vs. WT                  | 0.0467    |
|                                     |                                                           | ZT22: KO vs. WT                  | 0.0007    |
| F2g Eno1                            | Two-way ANOVA with Bonferroni's multiple comparisons test | ZT2: KO vs. WT                   | 0.091     |
|                                     |                                                           | ZT6: KO vs. WT                   | 0.0574    |
|                                     |                                                           | ZT10: KO vs. WT                  | >0.9999   |
|                                     |                                                           | ZT14: KO vs. WT                  | 0.9995    |
|                                     |                                                           | ZT18: KO vs. WT                  | 0.7174    |
|                                     |                                                           | ZT22: KO vs. WT                  | 0.001     |
| F2g Pfkp                            | Two-way ANOVA with Bonferroni's multiple comparisons test | ZT2: KO vs. WT                   | 0.0373    |
|                                     |                                                           | ZT6: KO vs. WT                   | <0.0001   |
|                                     |                                                           | ZT10: KO vs. WT                  | 0.0109    |
|                                     |                                                           | ZT14: KO vs. WT                  | 0.0027    |
|                                     |                                                           | ZT18: KO vs. WT                  | 0.0003    |
|                                     |                                                           | ZT22: KO vs. WT                  | 0.0034    |
| F3f q-PCR AC16:Rev-erb KD           | Unpaired t test                                           | Acadl: Con vs. Rev-erb KD        | 0.028021  |
|                                     |                                                           | Acsf6: Con vs. Rev-erb KD        | 0.001026  |
|                                     |                                                           | Cpt1a: Con vs. Rev-erb KD        | 0.001555  |
|                                     |                                                           | Pdk4: Con vs. Rev-erb KD         | 0.000049  |
|                                     |                                                           | Ppara: Con vs. Rev-erb KD        | 0.003392  |
|                                     |                                                           | Ehhahh: Con vs. Rev-erb KD       | 0.002942  |
|                                     |                                                           | Idh2: Con vs. Rev-erb KD         | 0.003145  |
| F3g FAO AC16: Rev-erb KD            | Unpaired t test                                           | Con vs. KD                       | <0.0001   |
| F3h Glucose uptake AC16: Rev-erb KD | Unpaired t test                                           | Con vs. KD                       | 0.0325    |
| F3i q-PCR AC16_QC: Double KD        | Unpaired t test                                           | E4bp4: Con vs. Rev-erb KD        | 0.000098  |
|                                     |                                                           | Bmal1: Con vs. Rev-erb KD        | <0.000001 |
|                                     |                                                           | Rev-erba: Con vs. Rev-erb KD     | <0.000001 |
|                                     |                                                           | Rev-erbb: Con vs. Rev-erb KD     | <0.000001 |
|                                     |                                                           | E4bp4: Con vs. Double KD         | 0.000052  |
|                                     |                                                           | Bmal1: Con vs. Double KD         | 0.000014  |
|                                     |                                                           | Rev-erba: Con vs. Double KD      | <0.000001 |
|                                     |                                                           | Rev-erbb: Con vs. Double KD      | <0.000001 |
|                                     |                                                           | E4bp4: Con vs. E4bp4 KD          | <0.000001 |
|                                     |                                                           | E4bp4: Rev-erb KD vs. Double KD  | 0.000008  |
| F3j q-PCR AC16: Double KD           | Unpaired t test                                           | Acadl: Con vs. Rev-erb KD        | 0.007222  |
|                                     |                                                           | Acsf6: Con vs. Rev-erb KD        | 0.001658  |
|                                     |                                                           | Cpt1a: Con vs. Rev-erb KD        | 0.004103  |
|                                     |                                                           | Pdk4: Con vs. Rev-erb KD         | 0.000423  |
|                                     |                                                           | Ppara: Con vs. Rev-erb KD        | 0.001181  |
|                                     |                                                           | Ehhahh: Con vs. Rev-erb KD       | 0.000452  |
|                                     |                                                           | Idh2: Con vs. Rev-erb KD         | 0.002581  |
|                                     |                                                           | Acadl: Rev-erb KD vs. Double KD  | 0.006675  |
|                                     |                                                           | Acsf6: Rev-erb KD vs. Double KD  | 0.000392  |
|                                     |                                                           | Cpt1a: Rev-erb KD vs. Double KD  | 0.014498  |
|                                     |                                                           | Pdk4: Rev-erb KD vs. Double KD   | 0.001271  |
|                                     |                                                           | Ppara: Rev-erb KD vs. Double KD  | 0.002549  |
|                                     |                                                           | Ehhahh: Rev-erb KD vs. Double KD | 0.551506  |
|                                     |                                                           | Idh2: Rev-erb KD vs. Double KD   | 0.164852  |
| F3k FAO AC16: Double KD             | Unpaired t test                                           | Con vs. Rev-erb KD               | <0.0001   |
|                                     |                                                           | Rev-erb KD vs. Double KD         | <0.0001   |
| F3l q-PCR AC16: E4bp4 OE            | Unpaired t test                                           | Abca1: Con vs. E4bp4 OE          | 0.001756  |
|                                     |                                                           | Acsf6: Con vs. E4bp4 OE          | 0.001724  |
|                                     |                                                           | Cpt1a: Con vs. E4bp4 OE          | 0.010756  |
|                                     |                                                           | Stat5b: Con vs. E4bp4 OE         | 0.005559  |
|                                     |                                                           | Gpam: Con vs. E4bp4 OE           | 0.001754  |
|                                     |                                                           | Ppara: Con vs. E4bp4 OE          | 0.013577  |
|                                     |                                                           | Pdk4: Con vs. E4bp4 OE           | 0.000685  |
|                                     |                                                           | Fbp2: Con vs. E4bp4 OE           | 0.003434  |
|                                     |                                                           | Pfkp: Con vs. E4bp4 OE           | 0.022463  |



|                                         |                                                           |                              |          |
|-----------------------------------------|-----------------------------------------------------------|------------------------------|----------|
|                                         |                                                           | Hk1: Con vs. E4bp4 OE        | 0.015698 |
| F3m FAO AC16: E4bp4 OE                  | Unpaired t test                                           | Con vs. E4bp4 OE             | 0.0008   |
| F3s Acadl                               | Two-way ANOVA with Bonferroni's multiple comparisons test | ZT6: KO vs. WT               | 0.0404   |
|                                         |                                                           | ZT14: KO vs. WT              | 0.0434   |
|                                         |                                                           | ZT22: KO vs. WT              | 0.0036   |
| F3s Acs16                               | Two-way ANOVA with Bonferroni's multiple comparisons test | ZT6: KO vs. WT               | 0.0171   |
|                                         |                                                           | ZT14: KO vs. WT              | 0.3974   |
|                                         |                                                           | ZT22: KO vs. WT              | >0.9999  |
| F3s Acot1                               | Two-way ANOVA with Bonferroni's multiple comparisons test | ZT6: KO vs. WT               | 0.0386   |
|                                         |                                                           | ZT14: KO vs. WT              | >0.9999  |
|                                         |                                                           | ZT22: KO vs. WT              | >0.9999  |
| F3s Idh1                                | Two-way ANOVA with Bonferroni's multiple comparisons test | ZT6: KO vs. WT               | 0.0224   |
|                                         |                                                           | ZT14: KO vs. WT              | 0.0423   |
|                                         |                                                           | ZT22: KO vs. WT              | 0.0339   |
| F3s Ech1                                | Two-way ANOVA with Bonferroni's multiple comparisons test | ZT6: KO vs. WT               | 0.0059   |
|                                         |                                                           | ZT14: KO vs. WT              | 0.0387   |
|                                         |                                                           | ZT22: KO vs. WT              | 0.039    |
| F3s Ucp3                                | Two-way ANOVA with Bonferroni's multiple comparisons test | ZT6: KO vs. WT               | 0.0242   |
|                                         |                                                           | ZT14: KO vs. WT              | 0.0752   |
|                                         |                                                           | ZT22: KO vs. WT              | 0.2026   |
| F3s Pgam1                               | Two-way ANOVA with Bonferroni's multiple comparisons test | ZT6: KO vs. WT               | 0.0018   |
|                                         |                                                           | ZT14: KO vs. WT              | 0.0746   |
|                                         |                                                           | ZT22: KO vs. WT              | 0.2799   |
| F3s Pfk1                                | Two-way ANOVA with Bonferroni's multiple comparisons test | ZT6: KO vs. WT               | 0.0169   |
|                                         |                                                           | ZT14: KO vs. WT              | 0.258    |
|                                         |                                                           | ZT22: KO vs. WT              | 0.3244   |
| F3s Pgk1                                | Two-way ANOVA with Bonferroni's multiple comparisons test | ZT6: KO vs. WT               | 0.0258   |
|                                         |                                                           | ZT14: KO vs. WT              | 0.4734   |
|                                         |                                                           | ZT22: KO vs. WT              | 0.3222   |
| F3s Hk1                                 | Two-way ANOVA with Bonferroni's multiple comparisons test | ZT6: KO vs. WT               | 0.0344   |
|                                         |                                                           | ZT14: KO vs. WT              | 0.0348   |
|                                         |                                                           | ZT22: KO vs. WT              | 0.0114   |
| F3s Pfkp                                | Two-way ANOVA with Bonferroni's multiple comparisons test | ZT6: KO vs. WT               | 0.018    |
|                                         |                                                           | ZT14: KO vs. WT              | 0.0203   |
|                                         |                                                           | ZT22: KO vs. WT              | 0.0285   |
| F3s Fbp2                                | Two-way ANOVA with Bonferroni's multiple comparisons test | ZT6: KO vs. WT               | 0.573    |
|                                         |                                                           | ZT14: KO vs. WT              | 0.0001   |
|                                         |                                                           | ZT22: KO vs. WT              | 0.0009   |
| F4f FAO                                 | Unpaired t test                                           | KO vs. WT                    | 0.0191   |
| F4g Glucose oxidation                   | Unpaired t test                                           | KO vs. WT                    | 0.0345   |
| F4h glucose uptake                      | Unpaired t test                                           | KO vs. WT                    | 0.0182   |
| F5a ECHO EF                             | Unpaired t test                                           | WT_CD vs. KO_CD              | 0.000247 |
|                                         |                                                           | WT_HFNSD vs. KO_HFNSD        | 0.000025 |
| F5a ECHO FS                             | Unpaired t test                                           | WT_CD vs. KO_CD              | 0.000386 |
|                                         |                                                           | WT_HFNSD vs. KO_HFNSD        | 0.00002  |
| F5a ECHO D;S                            | Unpaired t test                                           | WT_CD vs. KO_CD              | 0.00067  |
|                                         |                                                           | WT_HFNSD vs. KO_HFNSD        | 0.000211 |
| F5a ECHO D;d                            | Unpaired t test                                           | WT_CD vs. KO_CD              | 0.048405 |
|                                         |                                                           | WT_HFNSD vs. KO_HFNSD        | 0.012955 |
| F5a ECHO LVPWs                          | Unpaired t test                                           | WT_CD vs. KO_CD              | 0.031501 |
|                                         |                                                           | WT_HFNSD vs. KO_HFNSD        | 0.036986 |
| F5a ECHO LVPWd                          | Unpaired t test                                           | WT_CD vs. KO_CD              | 0.706779 |
|                                         |                                                           | WT_HFNSD vs. KO_HFNSD        | 0.878401 |
| F5b q-PCR Light cycle                   | Unpaired t test                                           | Ppara: KO_CD vs. KO_HFNSD    | 0.626051 |
|                                         |                                                           | Cd36: KO_CD vs. KO_HFNSD     | 0.821019 |
|                                         |                                                           | Acadl: KO_CD vs. KO_HFNSD    | 0.367278 |
|                                         |                                                           | Acadm: KO_CD vs. KO_HFNSD    | 0.059541 |
|                                         |                                                           | Acox1: KO_CD vs. KO_HFNSD    | 0.320293 |
|                                         |                                                           | Acsc1: KO_CD vs. KO_HFNSD    | 0.687731 |
|                                         |                                                           | Acs16: KO_CD vs. KO_HFNSD    | 0.517513 |
|                                         |                                                           | Acacb: KO_CD vs. KO_HFNSD    | 0.747695 |
|                                         |                                                           | Hadhb: KO_CD vs. KO_HFNSD    | 0.838916 |
|                                         |                                                           | Ech1: KO_CD vs. KO_HFNSD     | 0.508068 |
|                                         |                                                           | Gpam: KO_CD vs. KO_HFNSD     | 0.176435 |
|                                         |                                                           | Abca1: KO_CD vs. KO_HFNSD    | 0.463849 |
|                                         |                                                           | Ucp3: KO_CD vs. KO_HFNSD     | 0.383126 |
| F5b q-PCR Dark cycle                    | Unpaired t test                                           | Ppara: KO_CD vs. KO_HFNSD    | 0.673098 |
|                                         |                                                           | Cd36: KO_CD vs. KO_HFNSD     | 0.791177 |
|                                         |                                                           | Acadl: KO_CD vs. KO_HFNSD    | 0.25828  |
|                                         |                                                           | Acadm: KO_CD vs. KO_HFNSD    | 0.183683 |
|                                         |                                                           | Acox1: KO_CD vs. KO_HFNSD    | 0.857665 |
|                                         |                                                           | Acsc1: KO_CD vs. KO_HFNSD    | 0.778556 |
|                                         |                                                           | Acs16: KO_CD vs. KO_HFNSD    | 0.761664 |
|                                         |                                                           | Acacb: KO_CD vs. KO_HFNSD    | 0.917273 |
|                                         |                                                           | Hadhb: KO_CD vs. KO_HFNSD    | 0.84348  |
|                                         |                                                           | Ech1: KO_CD vs. KO_HFNSD     | 0.728381 |
|                                         |                                                           | Gpam: KO_CD vs. KO_HFNSD     | 0.118155 |
|                                         |                                                           | Abca1: KO_CD vs. KO_HFNSD    | 0.995273 |
|                                         |                                                           | Ucp3: KO_CD vs. KO_HFNSD     | 0.971645 |
| F5c HFNSD Food intake Calories from fat | Unpaired t test                                           | Light: WT_CD vs. KO_CD       | 0.707252 |
|                                         |                                                           | Dark: WT_CD vs. KO_CD        | 0.577827 |
|                                         |                                                           | Light: WT_HFNSD vs. KO_HFNSD | 0.980146 |
|                                         |                                                           | Dark: WT_HFNSD vs. KO_HFNSD  | 0.328565 |
|                                         |                                                           | Light: WT_CD vs. WT_HFNSD    | 0.007622 |

|                                         |                                                           |                                      |           |
|-----------------------------------------|-----------------------------------------------------------|--------------------------------------|-----------|
|                                         |                                                           | Dark: WT_CD vs. WT_HFNSD             | 0.00001   |
|                                         |                                                           | Light: KO_CD vs. KO_HFNSD            | 0.00368   |
|                                         |                                                           | Dark: KO_CD vs. KO_HFNSD             | <0.000001 |
| F5d BW HFNSD                            | Two-way ANOVA with Bonferroni's multiple comparisons test | 0 day on HFNSD: WT_HFNSD vs. WT_CD   | >0.9999   |
|                                         |                                                           | 91 day on HFNSD: KO_HFNSD vs. KO_CD  | 0.1163    |
|                                         |                                                           | WT_CD vs WT_HFNSD 0 min              | >0.9999   |
|                                         |                                                           | WT_CD vs WT_HFNSD 15 min             | 0.0525    |
|                                         |                                                           | WT_CD vs WT_HFNSD 30 min             | 0.0931    |
|                                         |                                                           | WT_CD vs WT_HFNSD 60 min             | 0.3738    |
|                                         |                                                           | WT_CD vs WT_HFNSD 90 min             | >0.9999   |
|                                         |                                                           | WT_CD vs WT_HFNSD 120 min            | >0.9999   |
|                                         |                                                           | KO_CD vs KO_HFNSD 0 min              | >0.9999   |
|                                         |                                                           | KO_CD vs KO_HFNSD 15 min             | >0.9999   |
|                                         |                                                           | KO_CD vs KO_HFNSD 30 min             | 0.037     |
|                                         |                                                           | KO_CD vs KO_HFNSD 60 min             | 0.3396    |
|                                         |                                                           | KO_CD vs KO_HFNSD 90 min             | >0.9999   |
|                                         |                                                           | KO_CD vs KO_HFNSD 120 min            | >0.9999   |
|                                         |                                                           | KO_CD vs WT_CD                       | 0.8729    |
| F5e AUC_GTT HFNSD                       | Unpaired t test                                           | KO_HFNSD vs WT_HFNSD                 | 0.3499    |
|                                         |                                                           | WT_CD vs WT_HFNSD                    | 0.0157    |
|                                         |                                                           | KO_CD vs KO_HFNSD                    | 0.04      |
|                                         |                                                           | KO_CD vs WT_CD                       | 0.5653    |
| F5f Insulin HFNSD                       | Unpaired t test                                           | KO_HFNSD vs WT_HFNSD                 | 0.5095    |
|                                         |                                                           | KO_CD vs WT_CD                       | 0.9354    |
| F5g HOMA-IR HFNSD                       | Unpaired t test                                           | KO_HFNSD vs WT_HFNSD                 | 0.6067    |
|                                         |                                                           | KO_CD vs WT_CD                       | 0.9681    |
| F5h b-hydroxybutyrate HFNSD             | Unpaired t test                                           | KO_HFNSD vs WT_HFNSD                 | 0.6084    |
|                                         |                                                           | KO_CD vs WT_CD                       | 0.1052    |
| F5i FFA HFNSD                           | Unpaired t test                                           | KO_HFNSD vs WT_HFNSD                 | 0.2943    |
|                                         |                                                           | Light: WT_CD vs. WT_HFHSD            | 0.000015  |
|                                         |                                                           | Dark: WT_CD vs. WT_HFHSD             | 0.000005  |
|                                         |                                                           | Light: KO_CD vs. KO_HFHSD            | 0.000025  |
|                                         |                                                           | Dark: KO_CD vs. KO_HFHSD             | <0.000001 |
| F6a HFHSD Food intake Calories from fat | Unpaired t test                                           | 0 days on HFHSD: WT_CD vs. WT_HFHSD  | 0.782339  |
|                                         |                                                           | 82 days on HFHSD: WT_CD vs. WT_HFHSD | 0.016568  |
|                                         |                                                           | 0 days on HFHSD: KO_CD vs. KO_HFHSD  | 0.312431  |
|                                         |                                                           | 82 days on HFHSD: KO_CD vs. KO_HFHSD | 0.001429  |
|                                         |                                                           | WT_CD vs WT_HFNSD 0 min              | >0.9999   |
|                                         |                                                           | WT_CD vs WT_HFNSD 15 min             | 0.0096    |
|                                         |                                                           | WT_CD vs WT_HFNSD 30 min             | <0.0001   |
|                                         |                                                           | WT_CD vs WT_HFNSD 60 min             | 0.0009    |
|                                         |                                                           | WT_CD vs WT_HFNSD 90 min             | 0.18      |
|                                         |                                                           | WT_CD vs WT_HFNSD 120 min            | 0.0328    |
|                                         |                                                           | KO_CD vs KO_HFNSD 0 min              | 0.1718    |
|                                         |                                                           | KO_CD vs KO_HFNSD 15 min             | 0.0002    |
|                                         |                                                           | KO_CD vs KO_HFNSD 30 min             | 0.0002    |
|                                         |                                                           | KO_CD vs KO_HFNSD 60 min             | <0.0001   |
|                                         |                                                           | KO_CD vs KO_HFNSD 90 min             | 0.0118    |
|                                         |                                                           | KO_CD vs KO_HFNSD 120 min            | 0.0139    |
| F6d Insulin HFHSD                       | Unpaired t test                                           | WT_CD vs WT_HFNSD                    | <0.0001   |
|                                         |                                                           | KO_CD vs KO_HFNSD                    | <0.0001   |
| F6e HOMA-IR HFHSD                       | Unpaired t test                                           | WT_CD vs WT_HFNSD                    | <0.0001   |
|                                         |                                                           | KO_CD vs KO_HFNSD                    | <0.0001   |
| F6f FFA HFHSD                           | Unpaired t test                                           | WT_CD vs WT_HFNSD                    | <0.0001   |
|                                         |                                                           | KO_CD vs KO_HFNSD                    | <0.0001   |
|                                         |                                                           | Ppara: KO_CD vs. KO_HFHSD            | <0.000001 |
|                                         |                                                           | Cd36: KO_CD vs. KO_HFHSD             | 0.000086  |
|                                         |                                                           | Acadl: KO_CD vs. KO_HFHSD            | 0.000001  |
|                                         |                                                           | Acadm: KO_CD vs. KO_HFHSD            | 0.000005  |
|                                         |                                                           | Acox1: KO_CD vs. KO_HFHSD            | 0.000013  |
|                                         |                                                           | Acss1: KO_CD vs. KO_HFHSD            | 0.000011  |
|                                         |                                                           | Acs16: KO_CD vs. KO_HFHSD            | 0.000003  |
|                                         |                                                           | Acacb: KO_CD vs. KO_HFHSD            | 0.000003  |
|                                         |                                                           | Hadhb: KO_CD vs. KO_HFHSD            | 0.000101  |
|                                         |                                                           | Ech1: KO_CD vs. KO_HFHSD             | <0.000001 |
|                                         |                                                           | Gpam: KO_CD vs. KO_HFHSD             | 0.000144  |
|                                         |                                                           | Abca1: KO_CD vs. KO_HFHSD            | 0.000043  |
|                                         |                                                           | Ucp3: KO_CD vs. KO_HFHSD             | 0.000039  |
|                                         |                                                           | Ppara: KO_CD vs. KO_HFHSD            | 0.465188  |
|                                         |                                                           | Cd36: KO_CD vs. KO_HFHSD             | 0.94482   |
|                                         |                                                           | Acadl: KO_CD vs. KO_HFHSD            | 0.257777  |
|                                         |                                                           | Acadm: KO_CD vs. KO_HFHSD            | 0.6441    |
|                                         |                                                           | Acox1: KO_CD vs. KO_HFHSD            | 0.995055  |
|                                         |                                                           | Acss1: KO_CD vs. KO_HFHSD            | 0.720594  |
|                                         |                                                           | Acs16: KO_CD vs. KO_HFHSD            | 0.208454  |
|                                         |                                                           | Acacb: KO_CD vs. KO_HFHSD            | 0.618178  |
|                                         |                                                           | Hadhb: KO_CD vs. KO_HFHSD            | 0.008525  |
|                                         |                                                           | Ech1: KO_CD vs. KO_HFHSD             | 0.085286  |
|                                         |                                                           | Gpam: KO_CD vs. KO_HFHSD             | 0.025501  |
|                                         |                                                           | Abca1: KO_CD vs. KO_HFHSD            | 0.003479  |
|                                         |                                                           | Ucp3: KO_CD vs. KO_HFHSD             | 0.00203   |
|                                         |                                                           | WT_CD vs. KO_CD                      | <0.0001   |
| F6k Female ECHO EF                      | Unpaired t test                                           | WT_HFHSD vs. KO_HFHSD                | 0.0067    |
|                                         |                                                           | WT_CD vs. WT_HFHSD                   | 0.5949    |

|                     |                             |                                         |         |
|---------------------|-----------------------------|-----------------------------------------|---------|
|                     |                             | KO_CD vs. KO_HFHSD                      | 0.0004  |
| F6k Female ECHO FS  | Unpaired t test             | WT_CD vs. KO_CD                         | <0.0001 |
|                     |                             | WT_HFHSD vs. KO_HFHSD                   | 0.0076  |
|                     |                             | WT_CD vs. WT_HFHSD                      | 0.5907  |
|                     |                             | KO_CD vs. KO_HFHSD                      | 0.0004  |
| F6k Female ECHO SV  | Unpaired t test             | WT_CD vs. KO_CD                         | <0.0001 |
|                     |                             | WT_HFHSD vs. KO_HFHSD                   | 0.0093  |
|                     |                             | WT_CD vs. WT_HFHSD                      | 0.6324  |
|                     |                             | KO_CD vs. KO_HFHSD                      | 0.0005  |
| F6k Female ECHO D;d | Unpaired t test             | WT_CD vs. KO_CD                         | 0.0014  |
|                     |                             | WT_HFHSD vs. KO_HFHSD                   | 0.3511  |
|                     |                             | WT_CD vs. WT_HFHSD                      | 0.1737  |
|                     |                             | KO_CD vs. KO_HFHSD                      | 0.0409  |
| F6m ECHO EF         | Unpaired t test             | WT_CD vs. KO_CD                         | <0.0001 |
|                     |                             | WT_HFHSD vs. KO_HFHSD                   | 0.1256  |
|                     |                             | WT_CD vs. WT_HFHSD                      | 0.1421  |
|                     |                             | KO_CD vs. KO_HFHSD                      | 0.0018  |
| F6m ECHO FS         | Unpaired t test             | WT_CD vs. KO_CD                         | 0.0001  |
|                     |                             | WT_HFHSD vs. KO_HFHSD                   | 0.3456  |
|                     |                             | WT_CD vs. WT_HFHSD                      | 0.1158  |
|                     |                             | KO_CD vs. KO_HFHSD                      | 0.0021  |
| F6m ECHO SV         | Unpaired t test             | WT_CD vs. KO_CD                         | 0.0075  |
|                     |                             | WT_HFHSD vs. KO_HFHSD                   | 0.1835  |
|                     |                             | WT_CD vs. WT_HFHSD                      | 0.3969  |
|                     |                             | KO_CD vs. KO_HFHSD                      | 0.0409  |
| F6m ECHO D;d        | Unpaired t test             | WT_CD vs. KO_CD                         | 0.0068  |
|                     |                             | WT_HFHSD vs. KO_HFHSD                   | 0.6241  |
|                     |                             | WT_CD vs. WT_HFHSD                      | 0.2352  |
|                     |                             | KO_CD vs. KO_HFHSD                      | 0.0017  |
| F6n HW/TL           | Unpaired t test             | WT_CD vs. KO_CD                         | 0.0075  |
|                     |                             | WT_HFHSD vs. KO_HFHSD                   | 0.3175  |
|                     |                             | WT_CD vs. WT_HFHSD                      | 0.0073  |
|                     |                             | KO_CD vs. KO_HFHSD                      | 0.9346  |
| F6o Survival        | Gehan-Breslow-Wilcoxon test | KO_CD vs. KO_HFHSD                      | 0.0089  |
| F6p ECHO EF         | Unpaired t test             | KO_Con vs. KO_2DG(day)/Etomoxir(night)  | 0.012   |
|                     |                             | KO_Con vs. KO_Etomoxir(day)/2-DG(night) | 0.2793  |
| F6p ECHO FS         | Unpaired t test             | KO_Con vs. KO_2DG(day)/Etomoxir(night)  | 0.0092  |
|                     |                             | KO_Con vs. KO_Etomoxir(day)/2-DG(night) | 0.2227  |
| F6p ECHO SV         | Unpaired t test             | KO_Con vs. KO_2DG(day)/Etomoxir(night)  | 0.0008  |
|                     |                             | KO_Con vs. KO_Etomoxir(day)/2-DG(night) | 0.5496  |
| F6p HW/BW           | Unpaired t test             | KO_Con vs. KO_2DG(day)/Etomoxir(night)  | 0.0191  |
|                     |                             | KO_Con vs. KO_Etomoxir(day)/2-DG(night) | 0.9708  |
